# Supplementary material for: Pyrimidinedione-mediated selective histone deacetylase 6 inhibitors with antitumor activity in colorectal cancer HCT116 cells
Source: Royal Society of Chemistry journal article supplement (doi:10.1039/c5ob01509j), 2015-01-01

**Electronic Supplementary Information**

**Pyrimidinedione-mediated selective Histone Deacetylase Inhibitors  
with Antitumor Activity in Colorectal Cancer HCT116 Cells.**

Yi-Min Liu,<sup>a</sup> Hsueh-Yun Lee,<sup>a</sup> Mei-Jung Lai,<sup>b</sup> Shiow-Lin Pan,<sup>c</sup> Hsiang-Ling Huang,<sup>a</sup> Fei-Chiao Kuo,<sup>a</sup> Mei-Chuan Chen,<sup>\*d</sup> and Jing-Ping Liou<sup>\*a</sup>

**Contents:**

|                                                             |       |
|-------------------------------------------------------------|-------|
| HPLC purity data for synthetic compounds.....               | ESI2  |
| Supplemental Figure S1 .....                                | ESI3  |
| Supplemental Figure S2.....                                 | ESI4  |
| <sup>1</sup> H-NMR Spectra for compounds <b>6-17</b> .....  | ESI5  |
| <sup>13</sup> C-NMR Spectra for compounds <b>6-17</b> ..... | ESI19 |

**HPLC purity determination:**

The percentage purity of compounds were determined by an Agilent 1100 series HPLC system using C18 column.

Elution conditions: Mobile phase A-Acetonitrile; Mobile phase B-Water containing 0.1% formic acid + 10 mmol NH<sub>4</sub>OAc. The flow-rate was 0.2 ml/min and the injection volume was 5 µl. The system operated at 25 °C. Peaks were detected at 210 nm.

**Table 1.** Elution condition

| Time (min) | Mobile Phase A (ratio) | Mobile Phase B (ratio) |
|------------|------------------------|------------------------|
| 0          | 10                     | 90                     |
| 45         | 90                     | 10                     |
| 50         | 10                     | 90                     |
| 60         | 10                     | 90                     |

**Table 2.** Purity of synthetic compounds

C18 column: Agilent ZORBAX Eclipse XDB-C18 5µm. 4.6 mm × 150 mm column

| Compounds | Retention time (min) | % Purity |
|-----------|----------------------|----------|
| <b>6</b>  | 15.00                | 95.32    |
| <b>7</b>  | 23.57                | 99.61    |
| <b>8</b>  | 18.63                | 99.71    |
| <b>9</b>  | 26.66                | 99.49    |
| <b>10</b> | 19.94                | 98.85    |
| <b>11</b> | 19.62                | 98.13    |

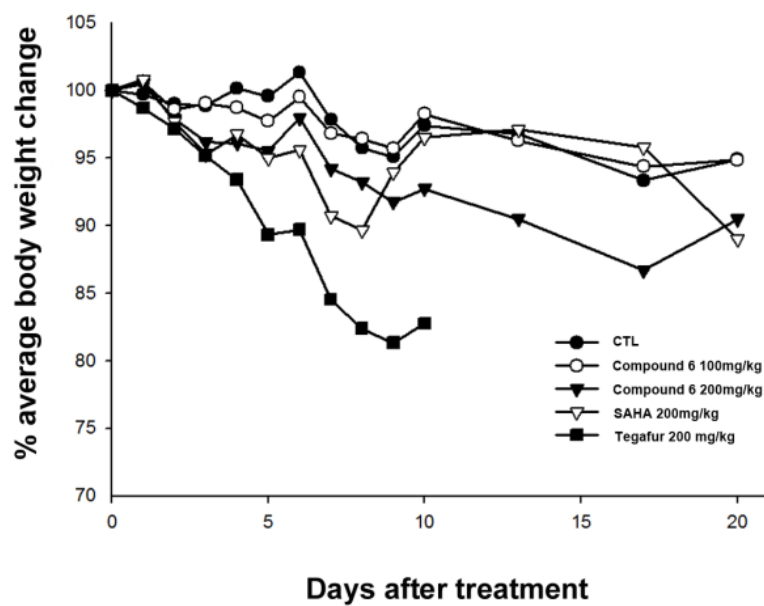

**Figure S1.** Mean change from baseline in weight in HCT116 xenograft model.

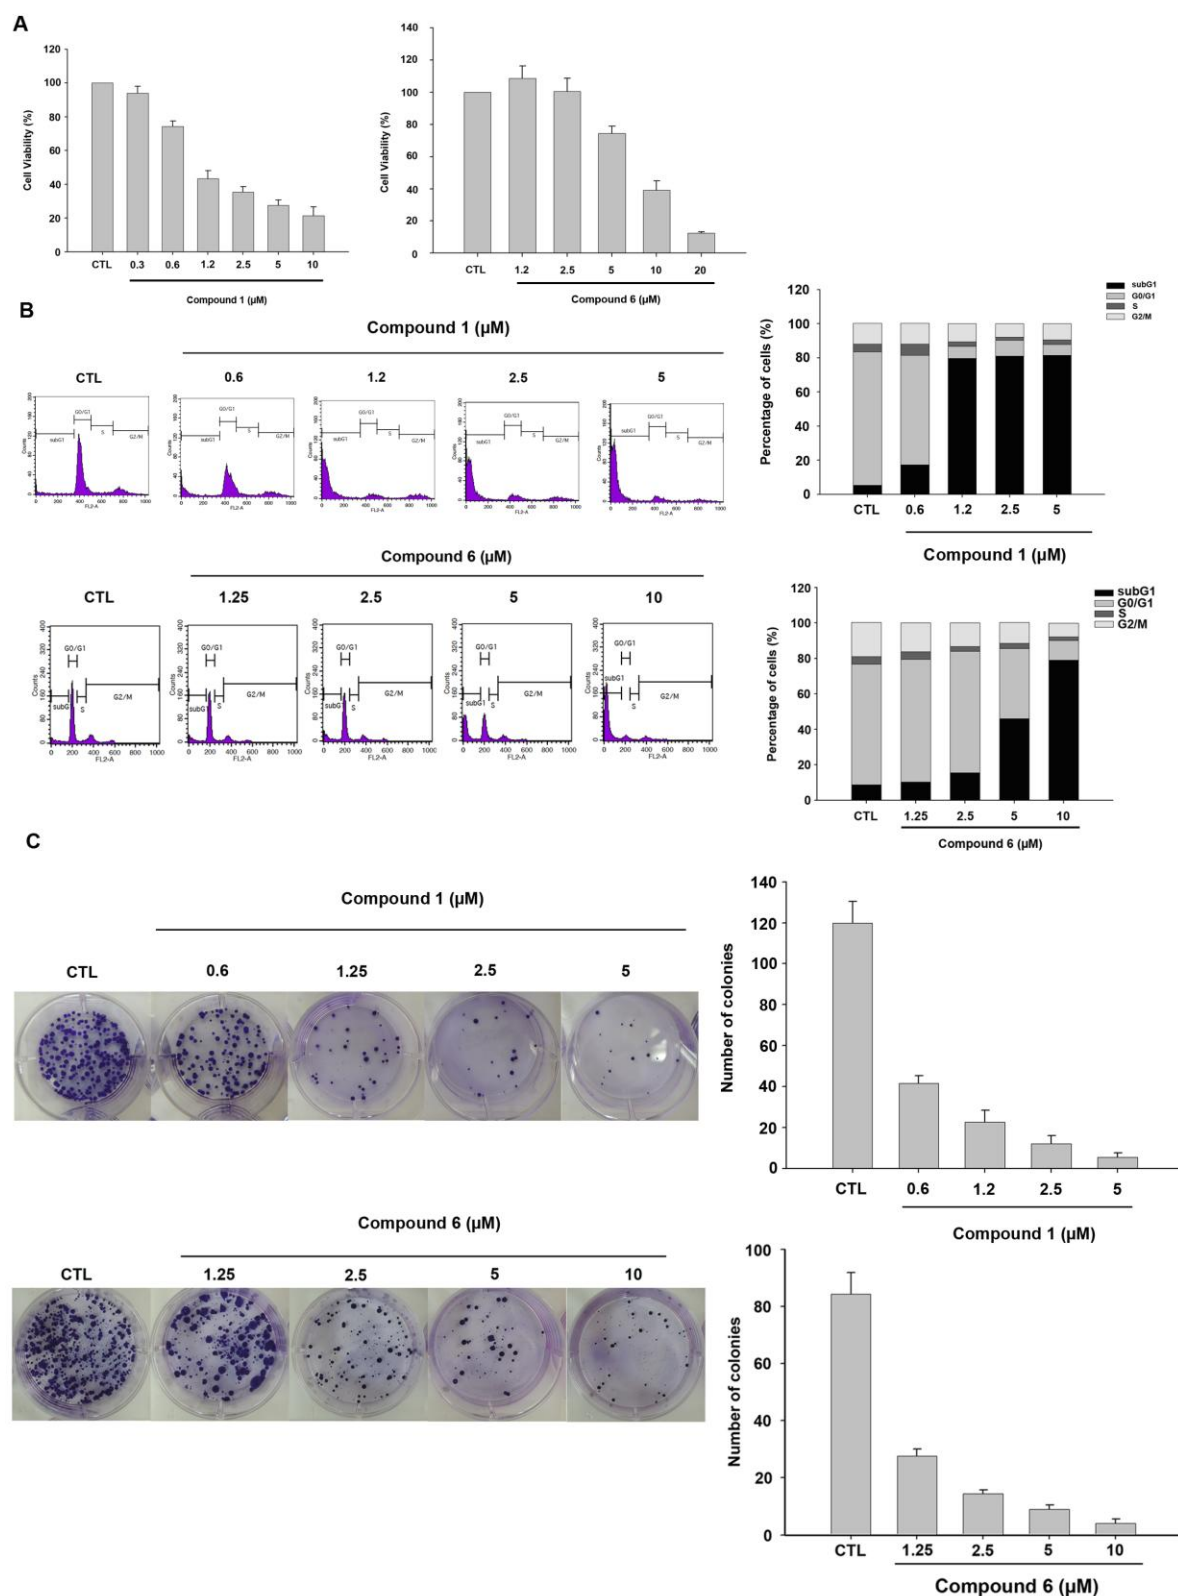

**Figure. S2.** The comparison of compound 1 and 6 in HCT116 cell models. Cells were treated with indicated concentrations of indicated drugs for 48 h in MTT assay (A) and Flow cytometric analysis (B). Clonogenic survival (C) was assessed as described in the Experimental section.

<sup>1</sup>H Spectrum for compound 6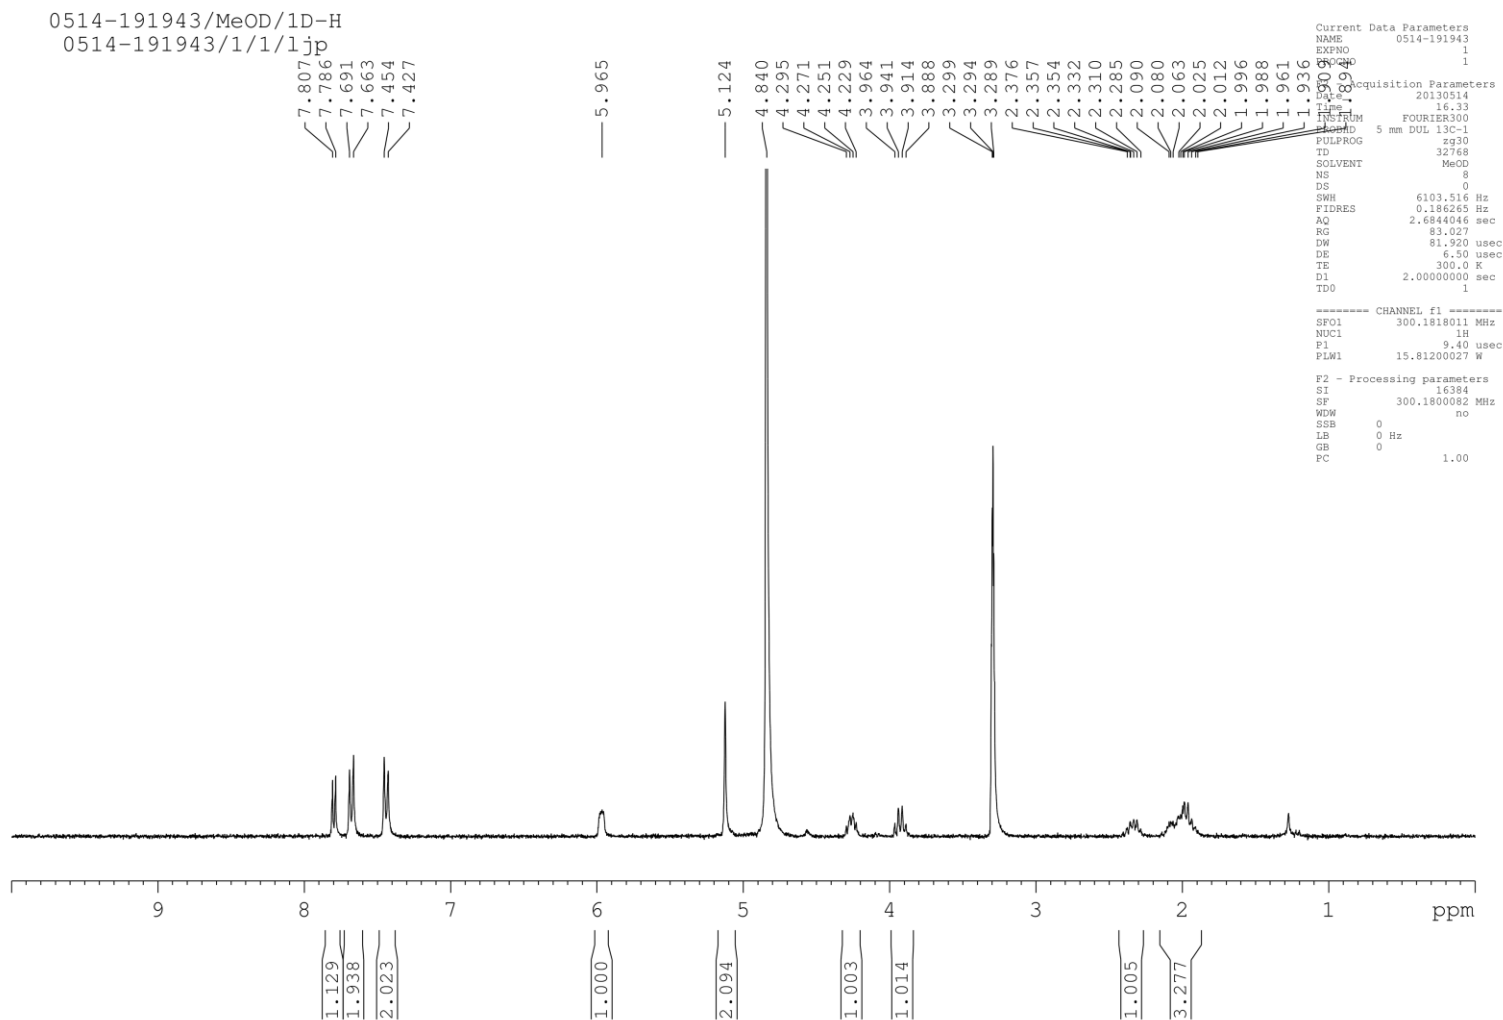

<sup>1</sup>H Spectrum for compound 7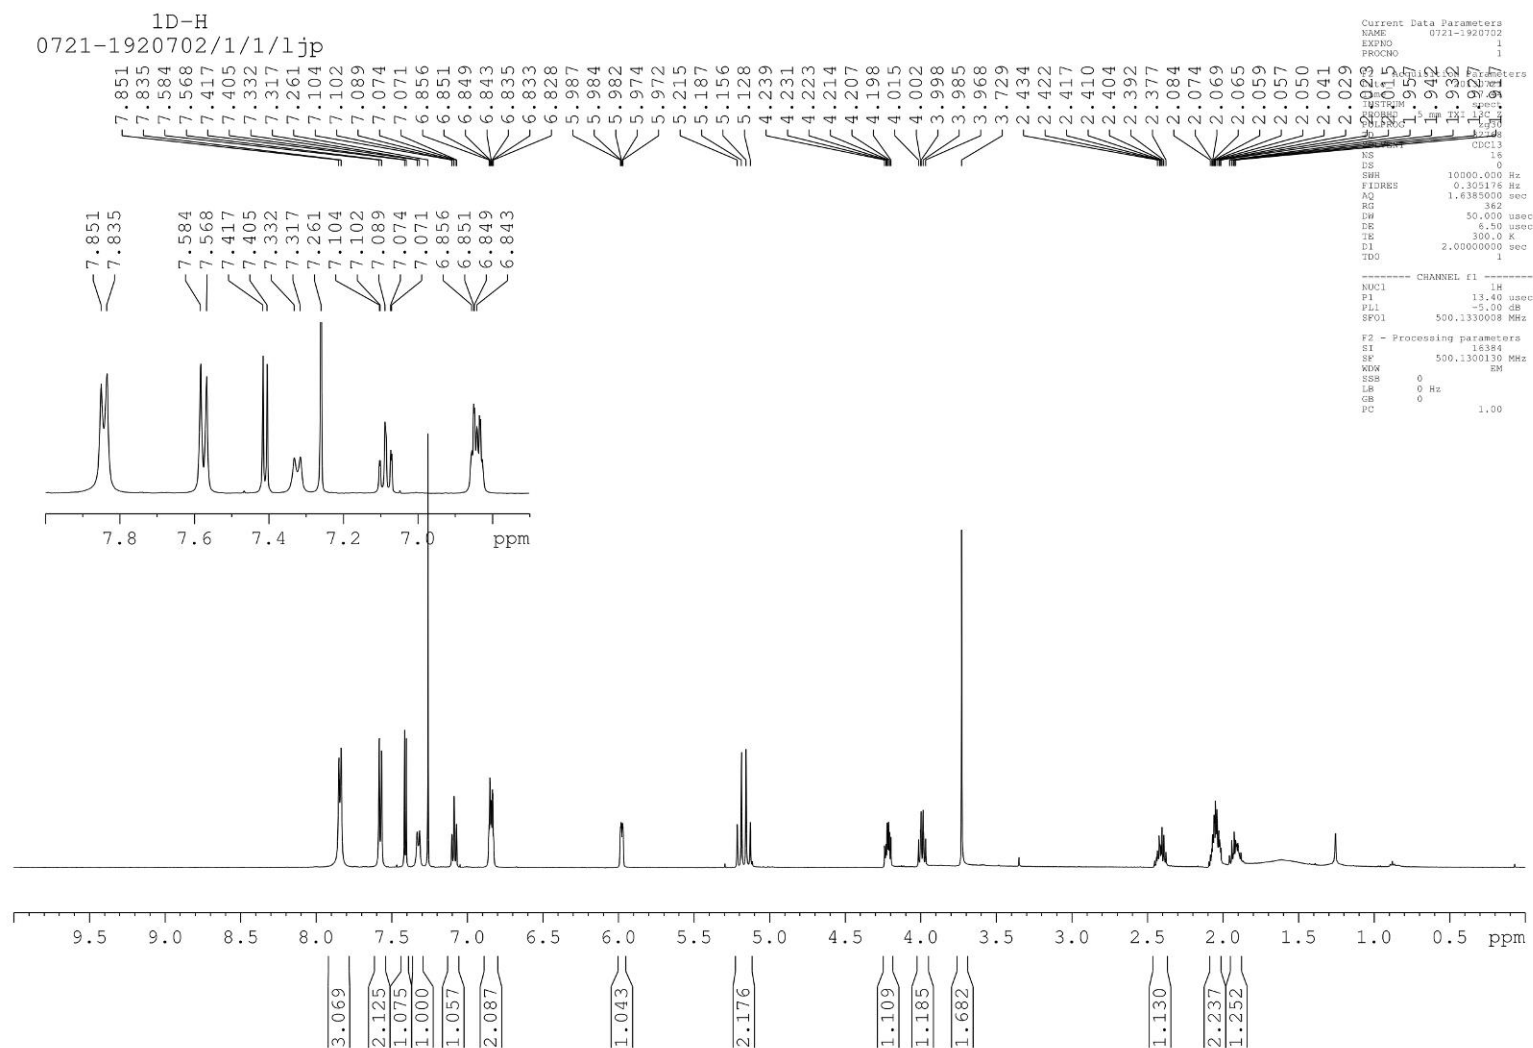

<sup>1</sup>H Spectrum for compound 8

0502-192507B/DMSO-d6/1D-H

0502-192507B/1/1/1jp

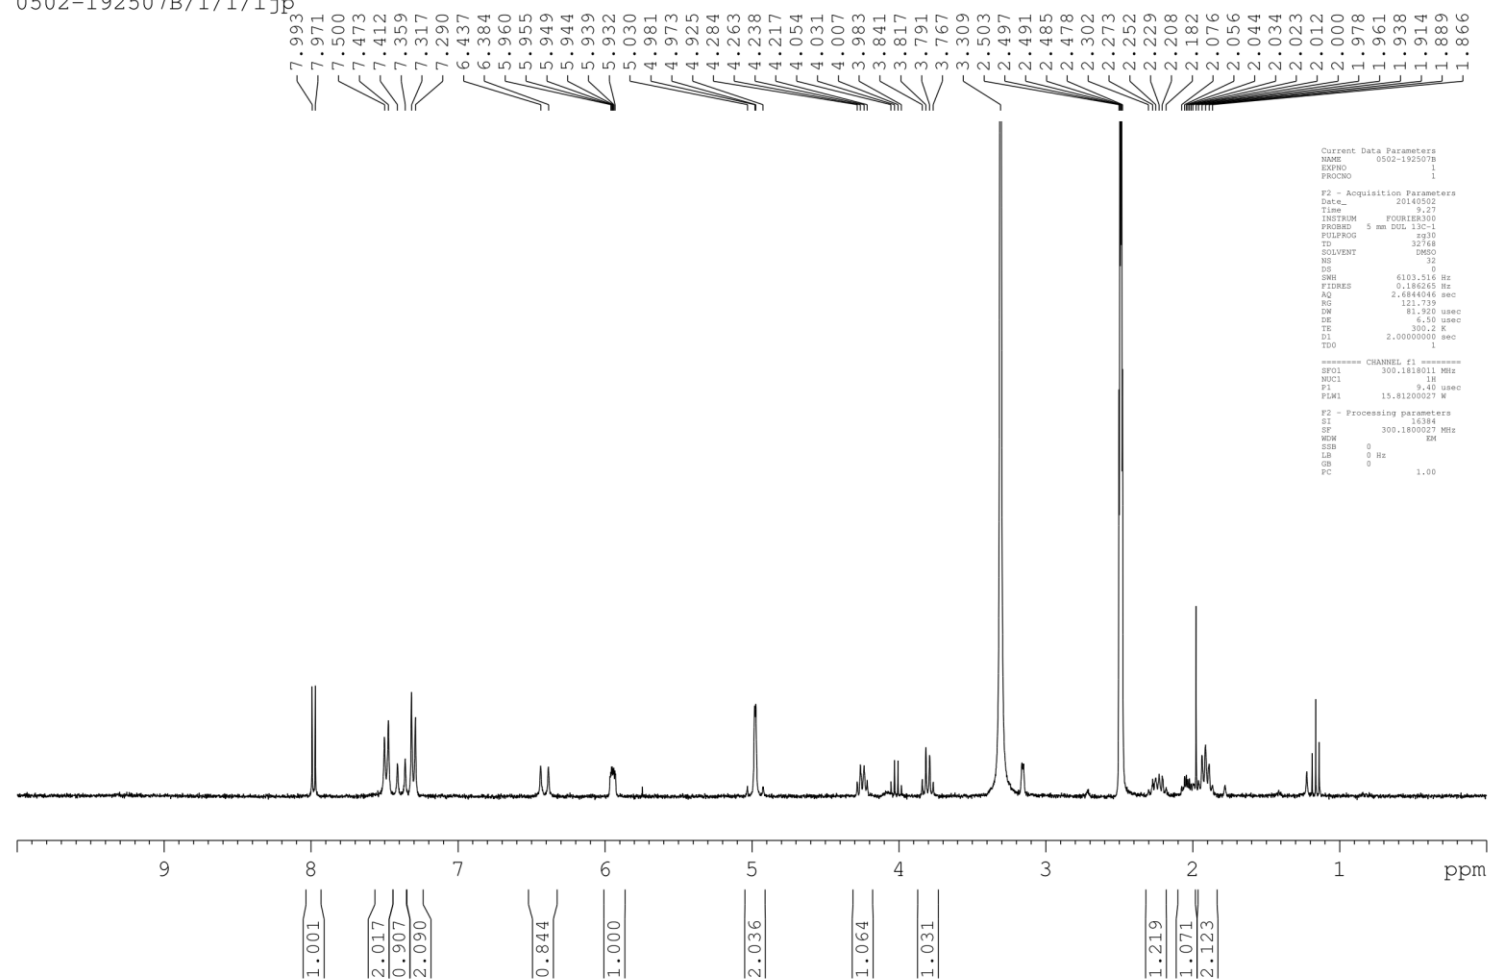

<sup>1</sup>H Spectrum for compound 9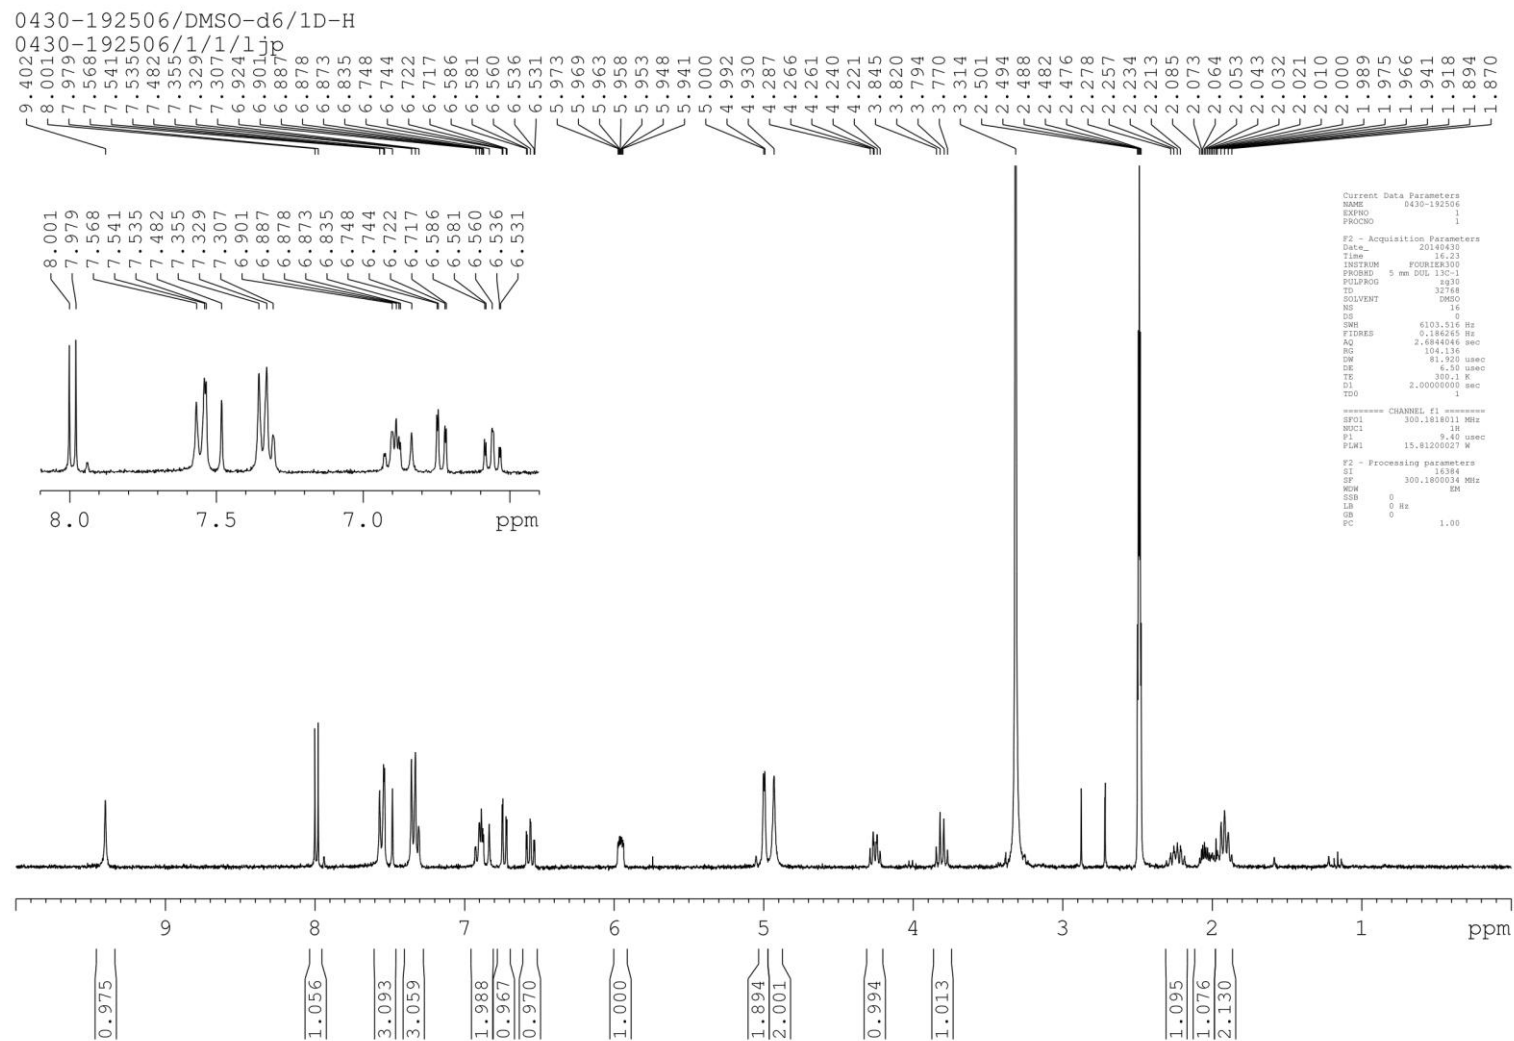



<sup>1</sup>H Spectrum for compound 10

1D-H  
0912-1925642nd

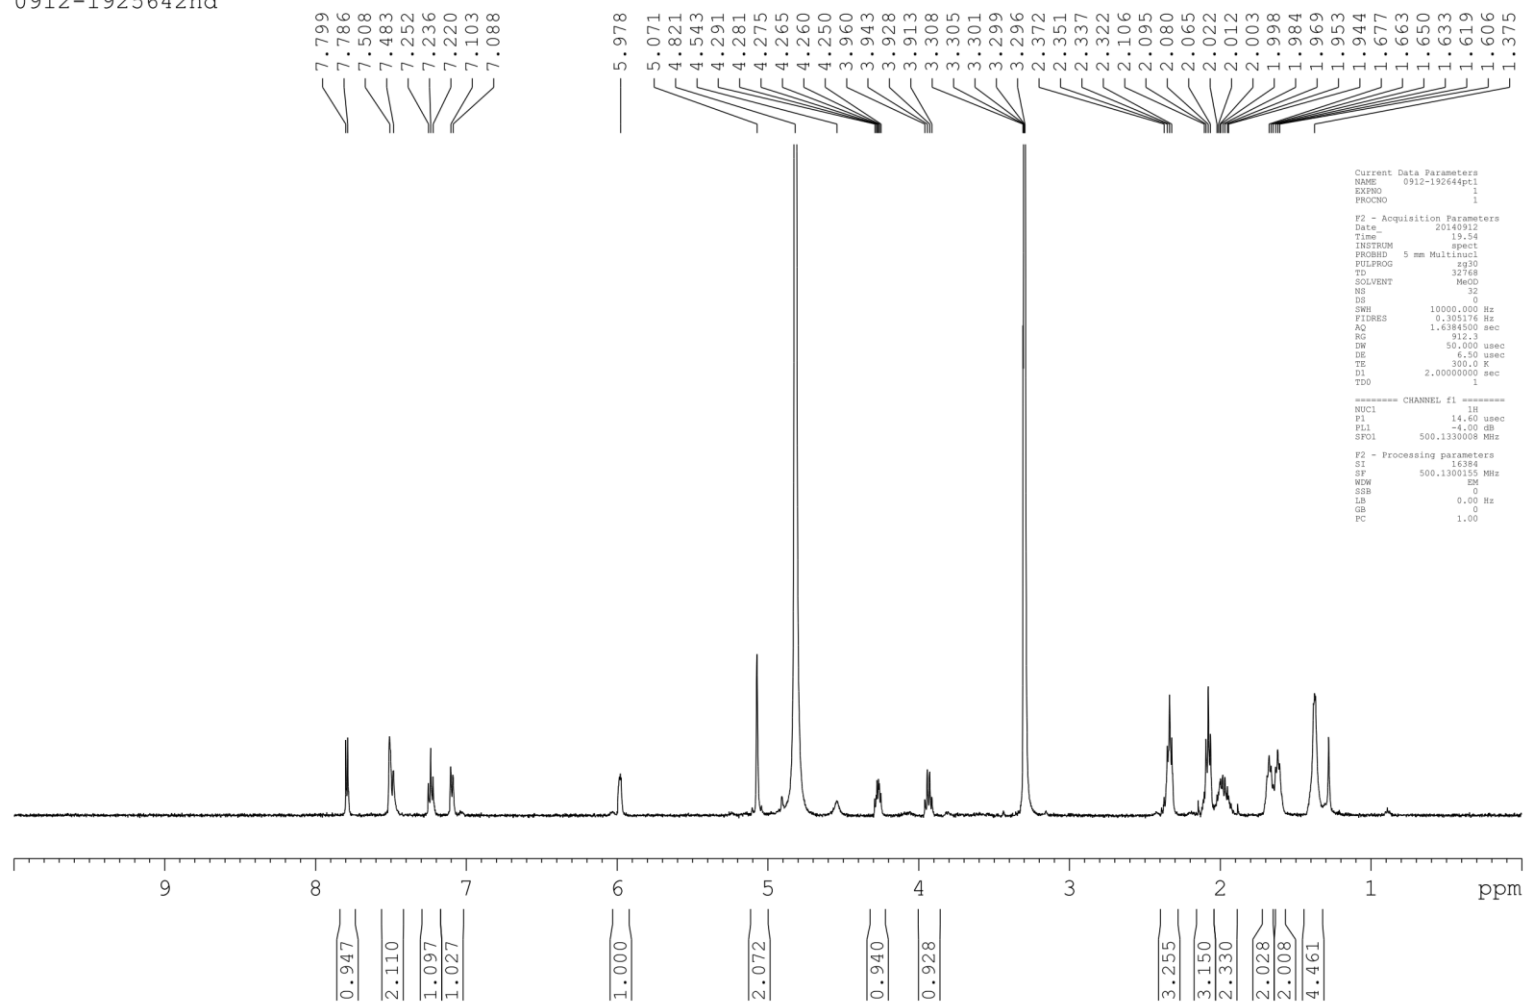

<sup>1</sup>H Spectrum for compound 11

0523-192557/DMSO-d6/1D-H  
0523-192557/1/1.jp

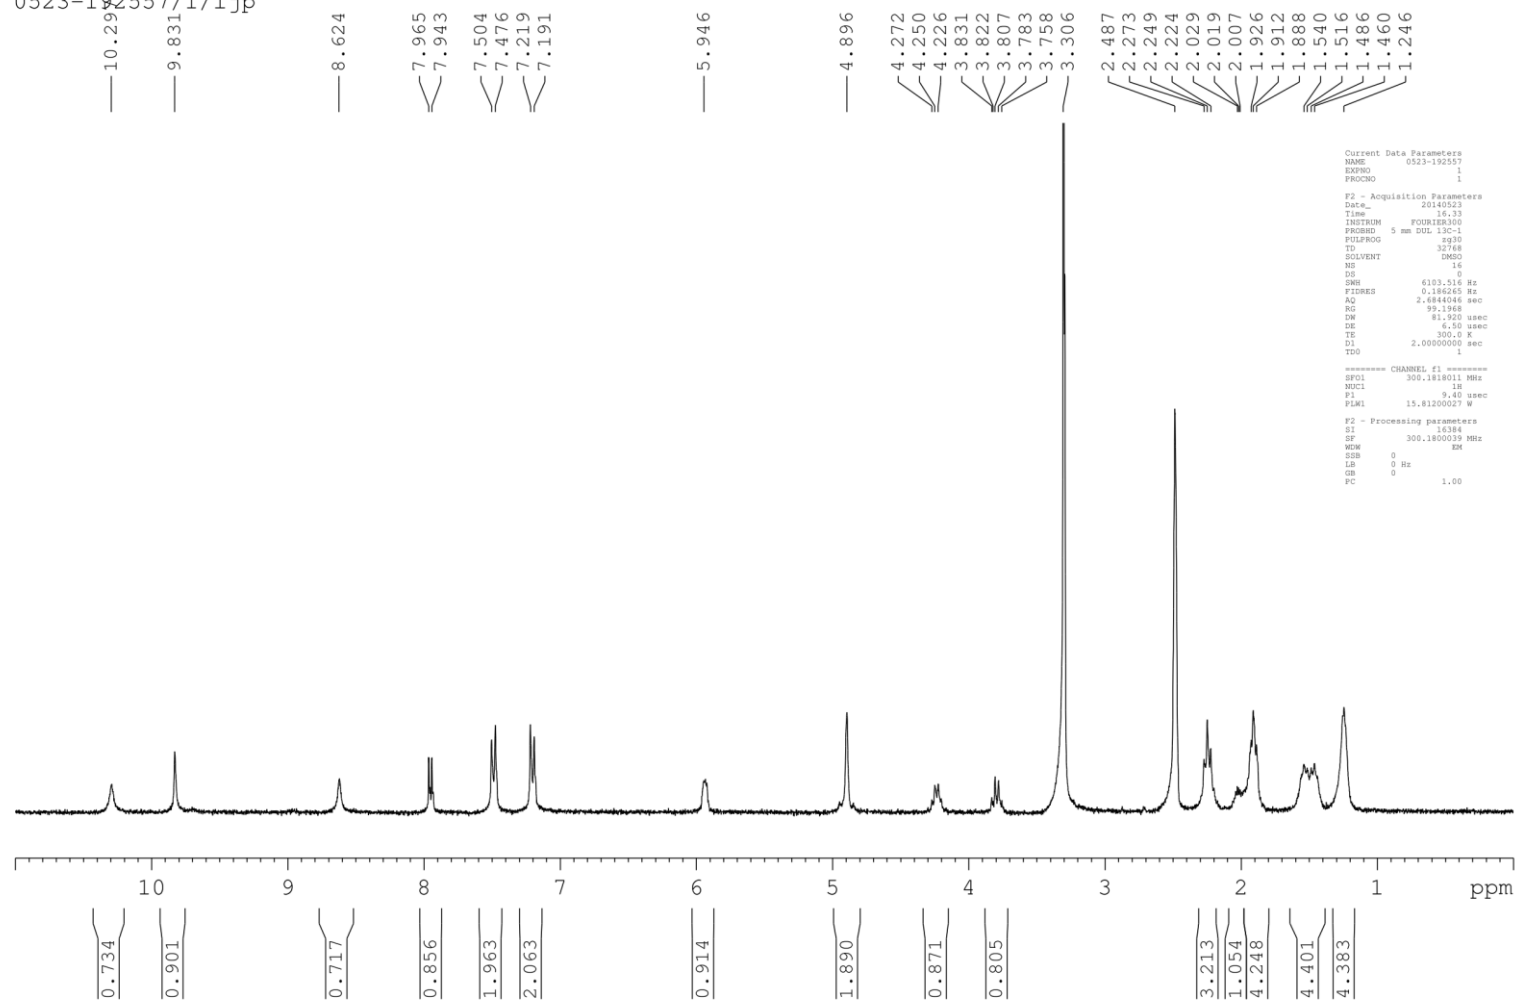

<sup>1</sup>H Spectrum for compound 12

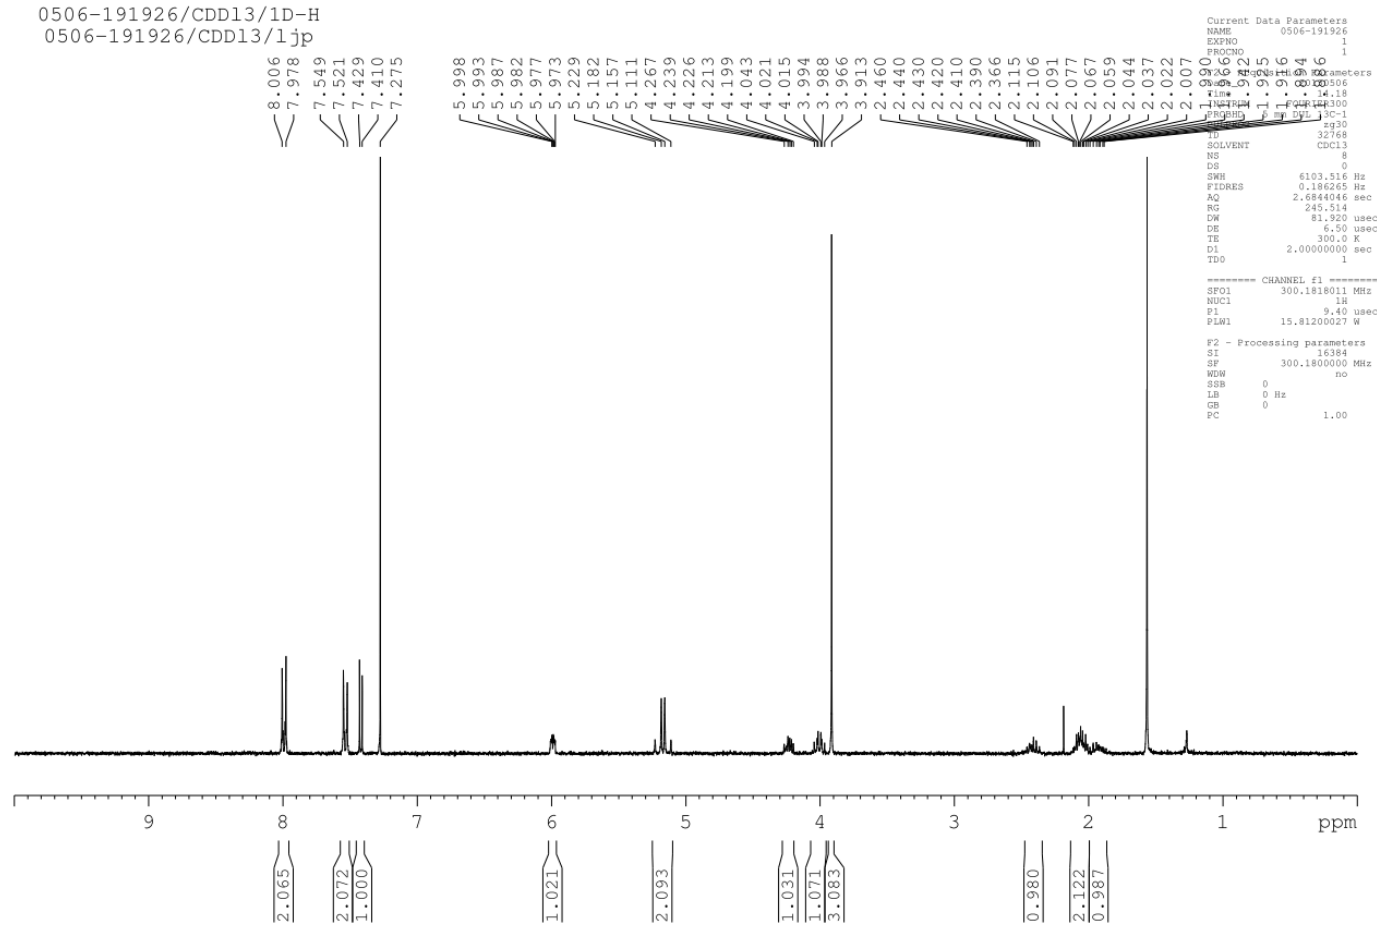

$^1\text{H}$  Spectrum for compound 13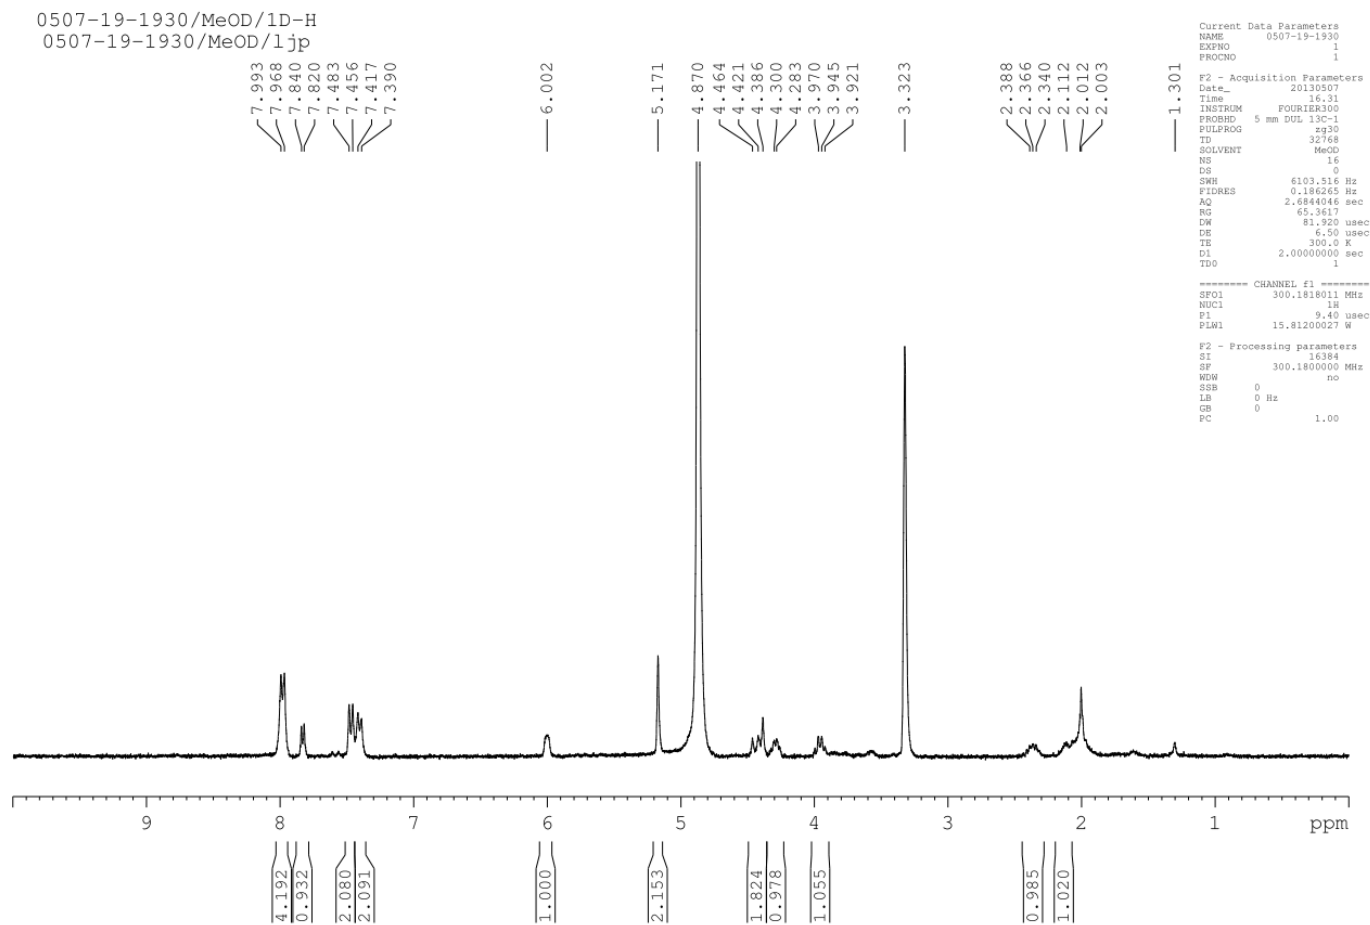

<sup>1</sup>H Spectrum for compound 14

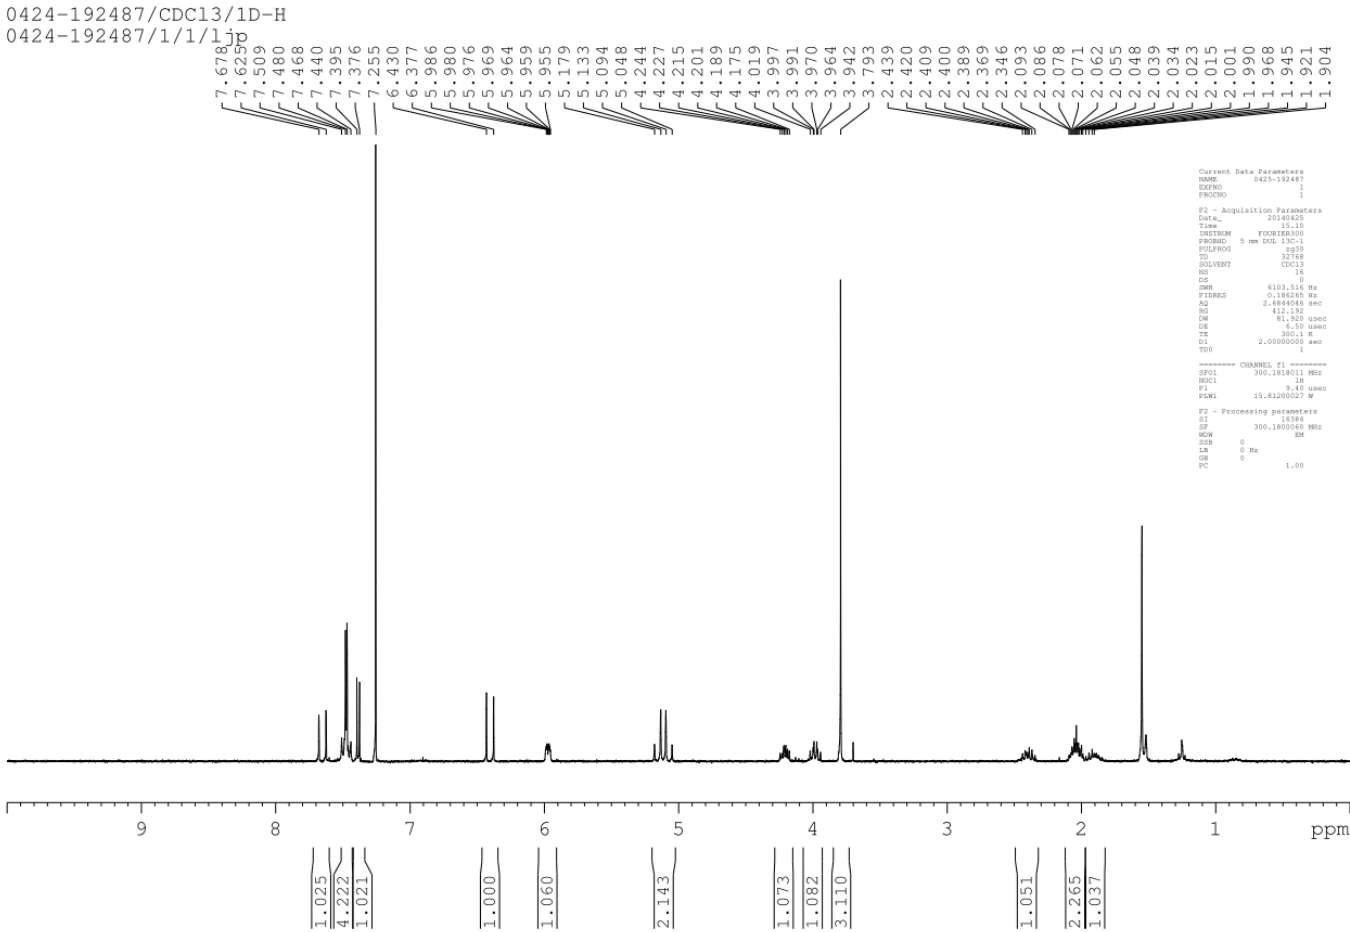

<sup>1</sup>H Spectrum for compound 15

0429-192499/DMSO-d6/1D-H  
0429-192499/1/1/1jp

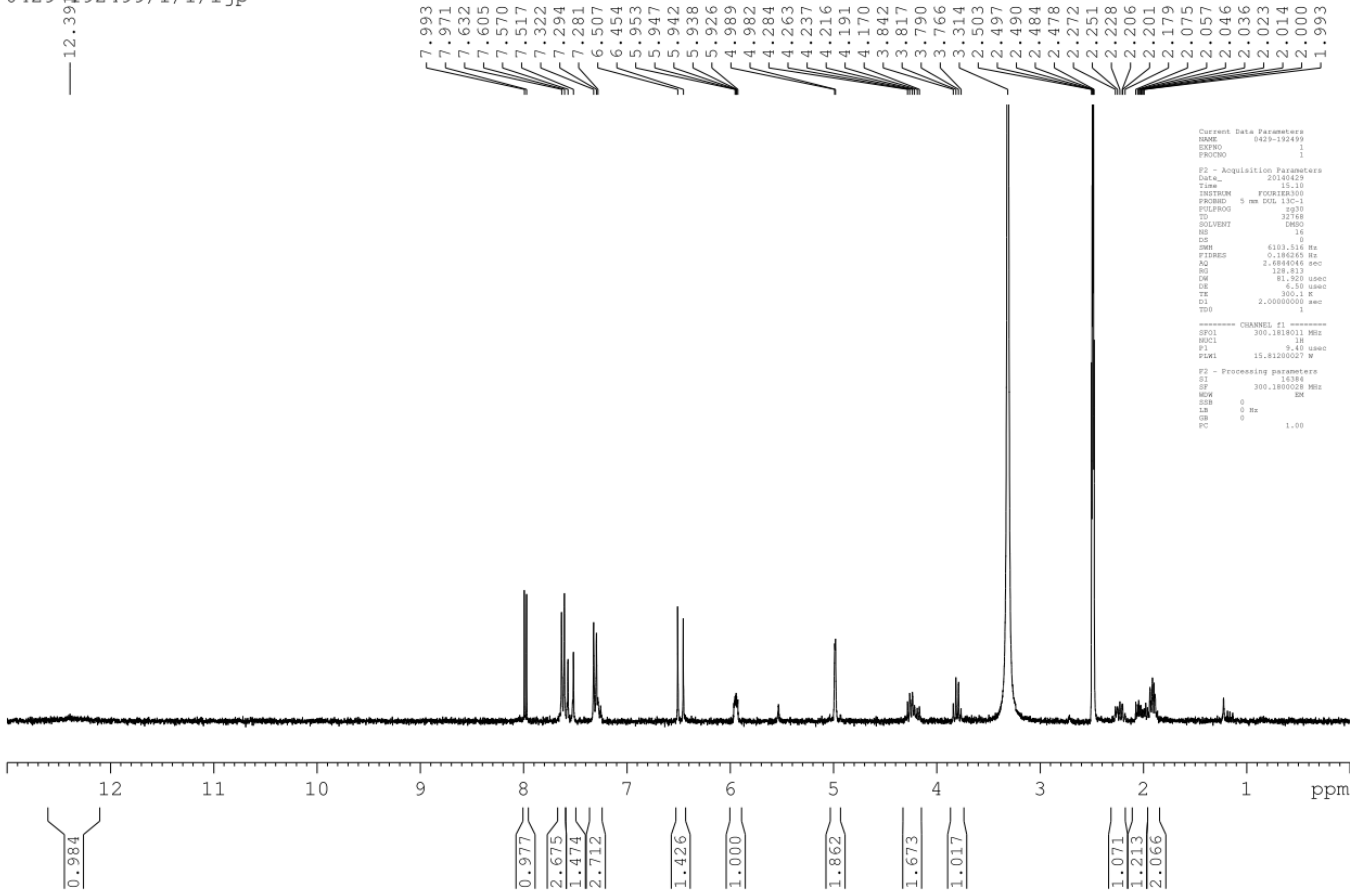

$^1\text{H}$  Spectrum for compound 16a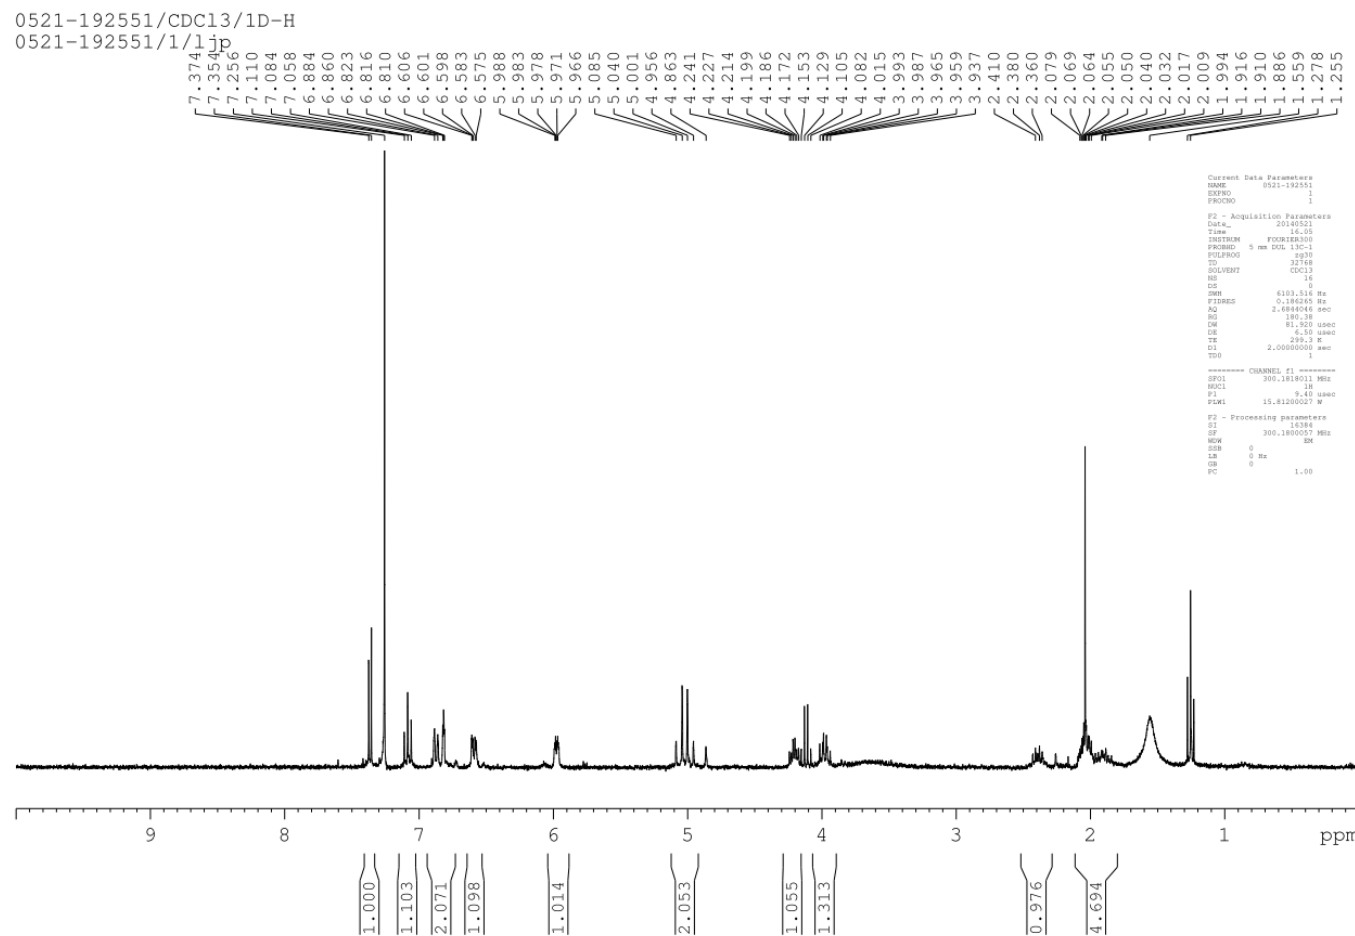

<sup>1</sup>H Spectrum for compound 16b

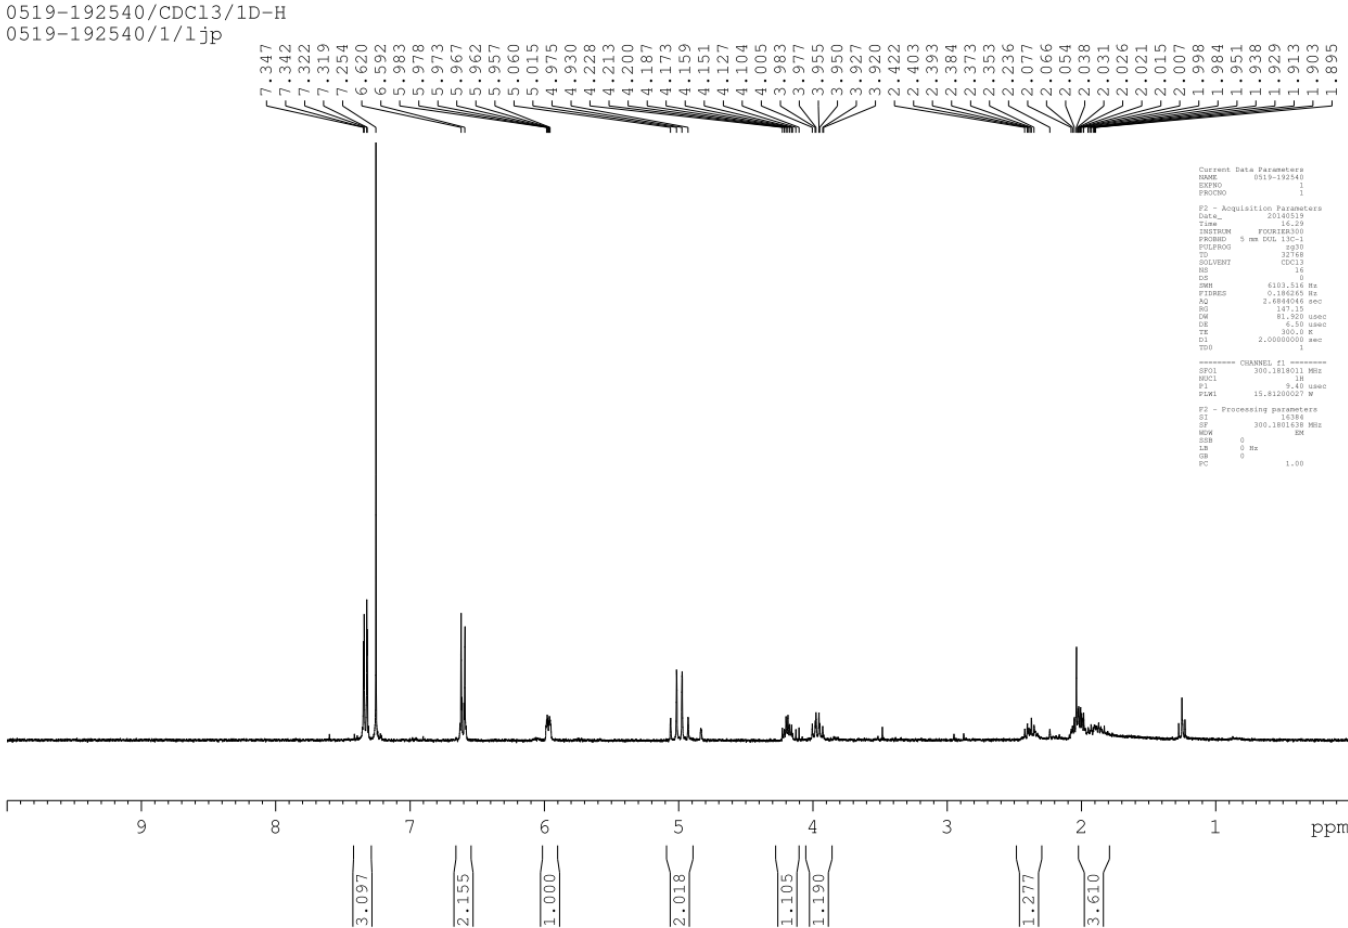



<sup>1</sup>H Spectrum for compound 17a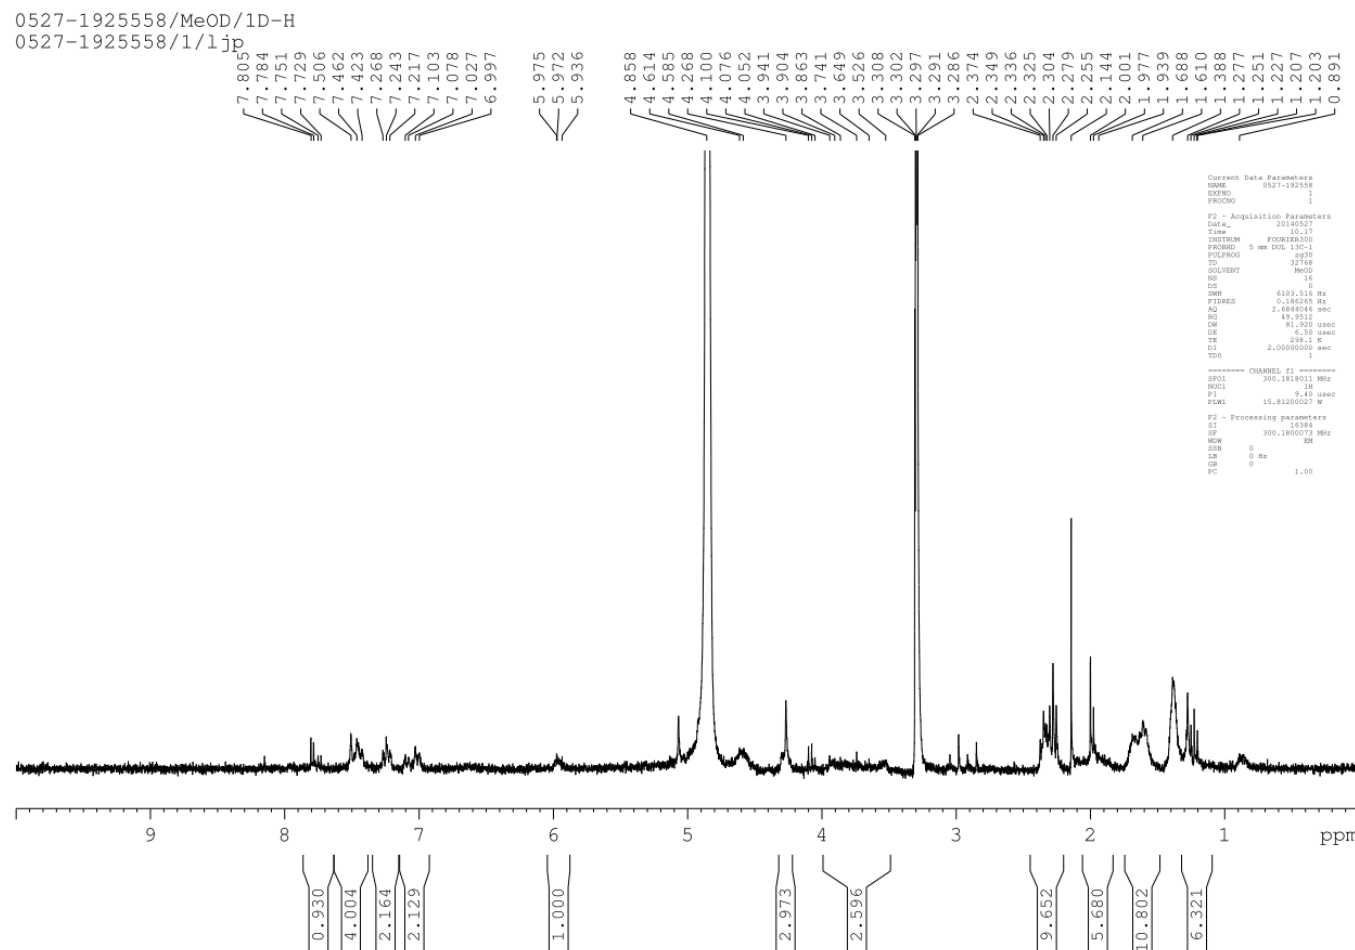

$^1\text{H}$  Spectrum for compound 17b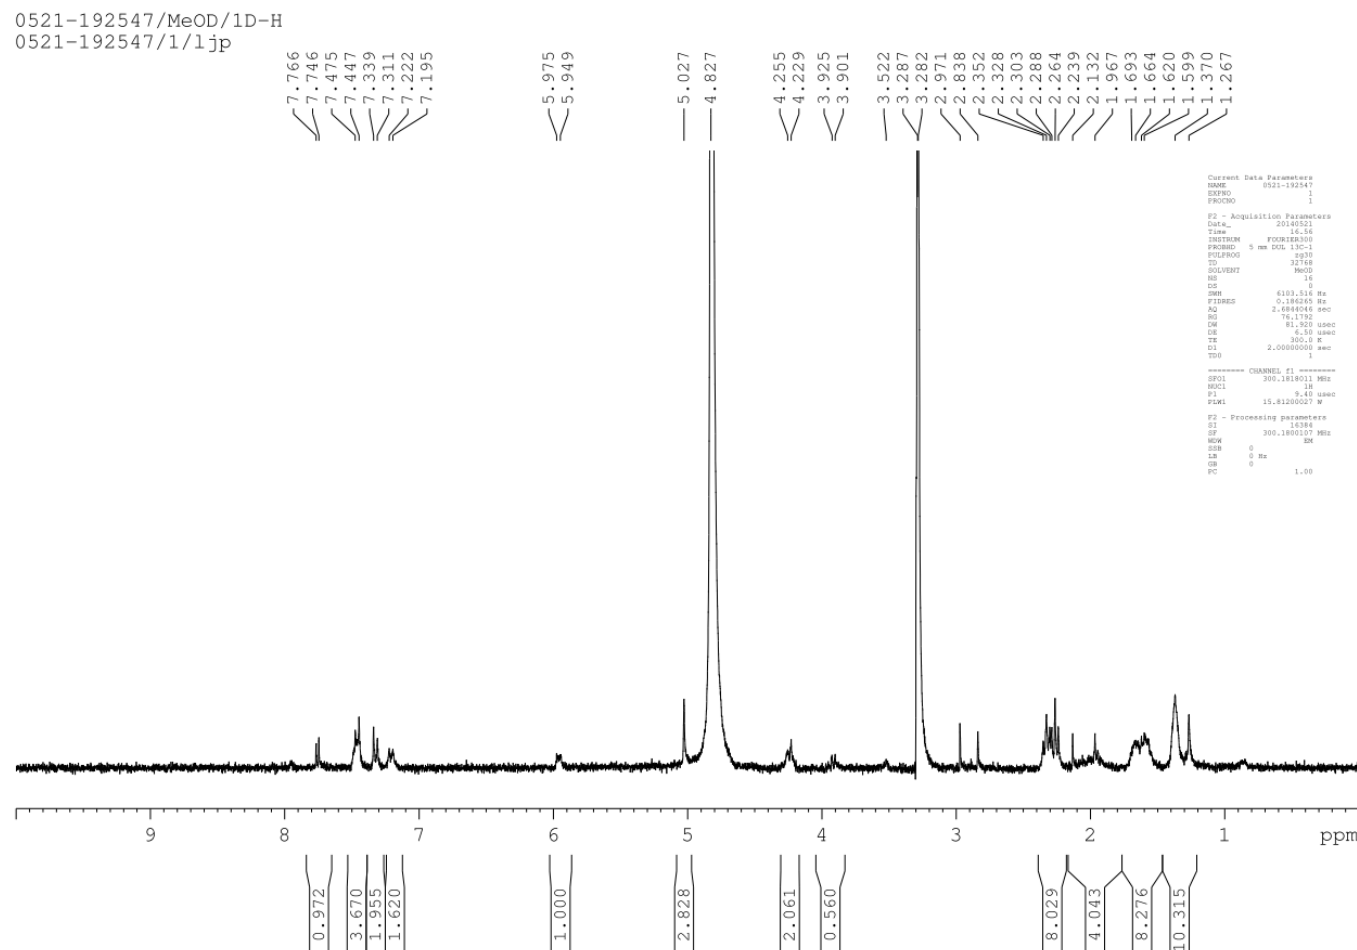

<sup>13</sup>C Spectrum for compound 6

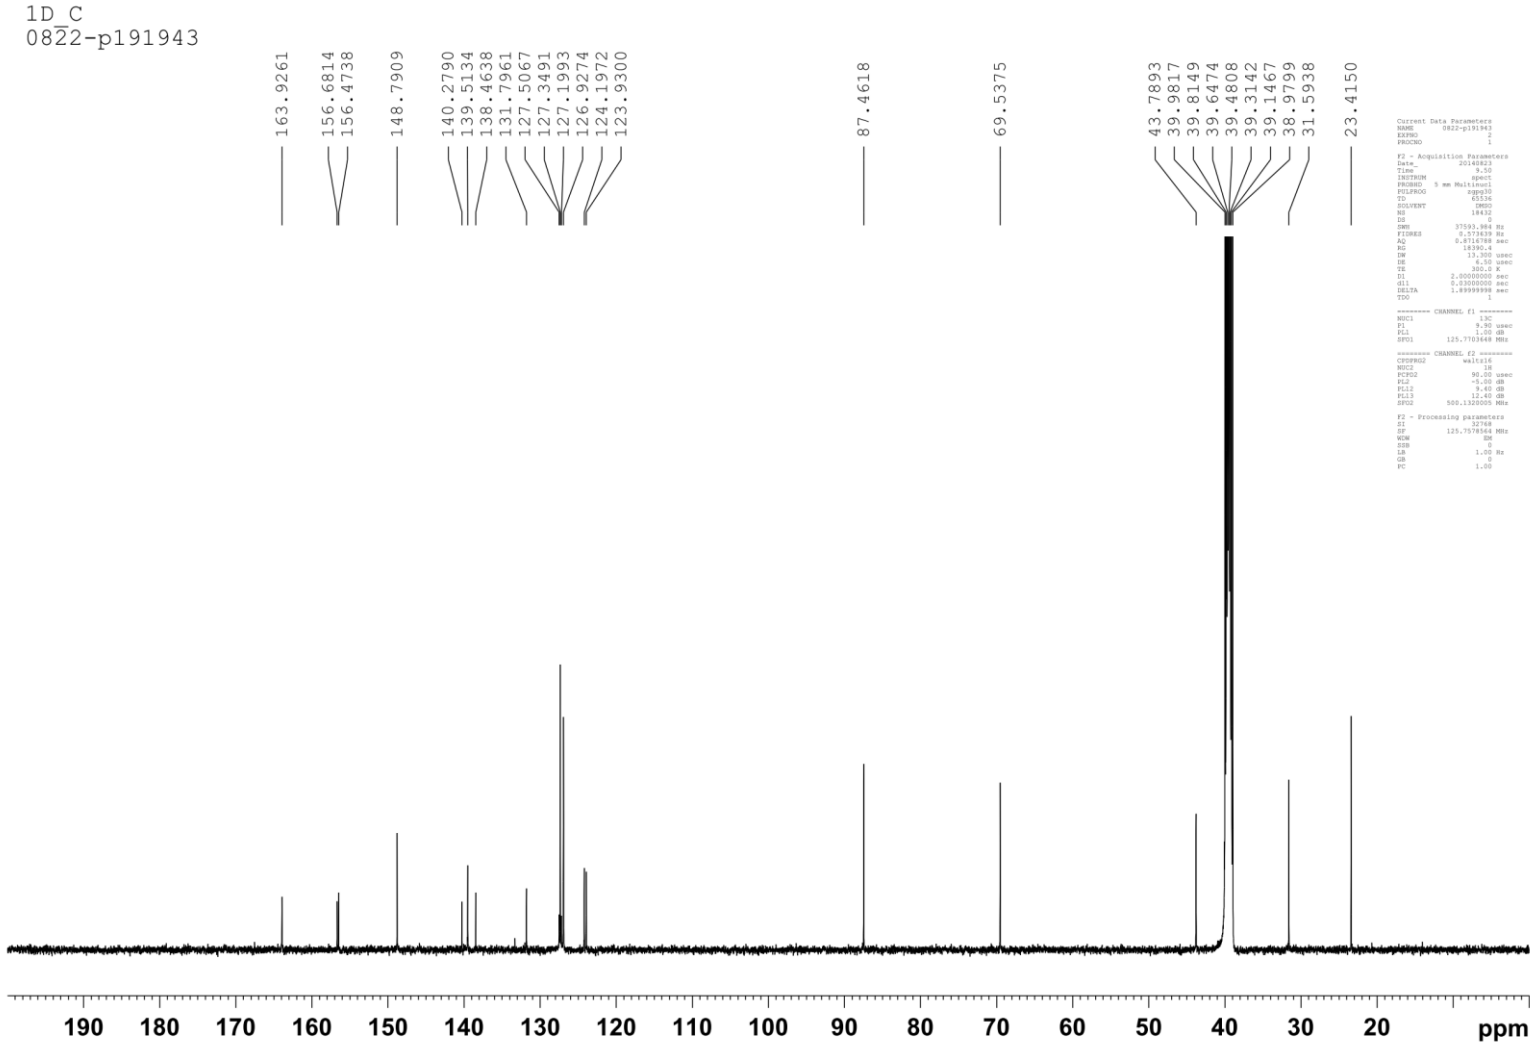

<sup>13</sup>C Spectrum for compound 7

1D\_C  
0822-p1920702

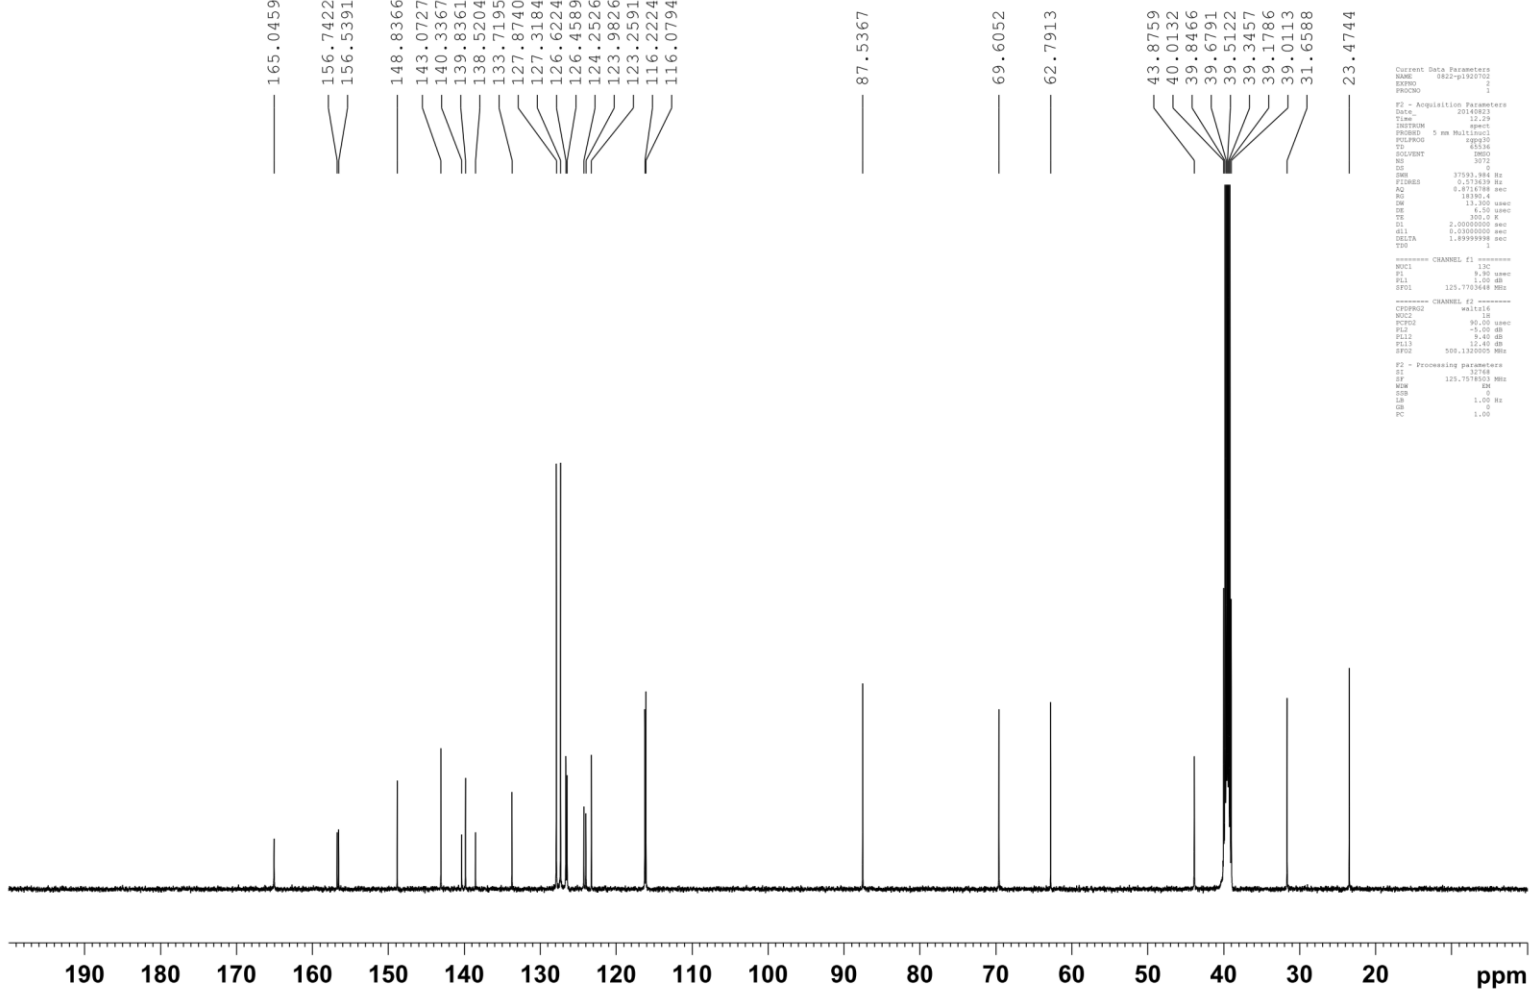

Current Data Parameters  
NAME 0822-p1920702  
EXPNO 1  
PROCNO 1  
F2 - Acquisition Parameters  
Date\_ 20140821  
Time 12.29  
INSTRUM spect  
PULPROG zgpg30  
POLPROG zgpg30  
TD 65536  
SOLVENT DMSO  
NS 5072  
DS 2  
SWH 37591.984 Hz  
FIDRES 0.571819 Hz  
AQ 0.6716788 sec  
RG 18387.4  
DM 13.300 umsec  
DE 6.50 umsec  
TE 300.2 K  
SI 2.00000000 sec  
SFI 0.00000000 sec  
DELTA 1.99999998 sec  
TD 1  
===== CHANNEL f1 =====  
NUC1 13C  
P1 16.00 umsec  
PL1 0.00 dB  
SFO1 125.7703648 MHz  
===== CHANNEL f2 =====  
CPDPRG2 waltz16  
NUC2 1H  
P2 9.00 umsec  
PL2 0.00 dB  
PL12 19.00 dB  
PL13 19.00 dB  
SFO2 500.1320050 MHz  
F2 - Processing parameters  
SI 32768  
SF 125.7678013 MHz  
WDW EM  
SSB 0  
GB 0.00 Hz  
PC 1.00

<sup>13</sup>C Spectrum for compound 8

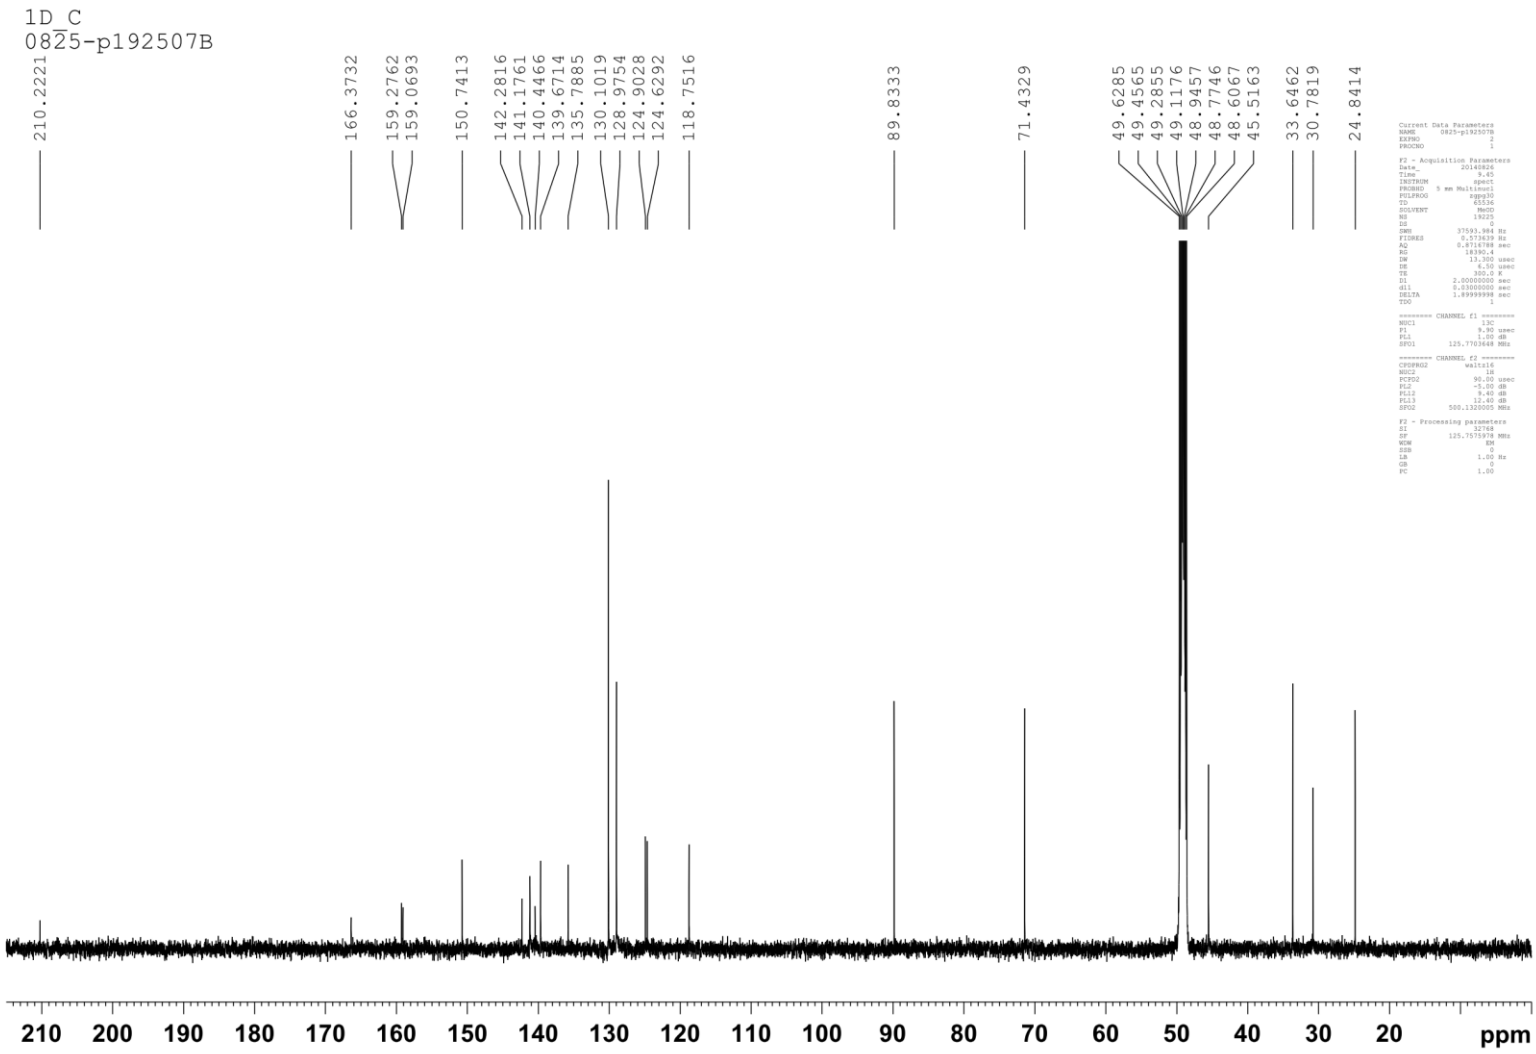

$^{13}\text{C}$  Spectrum for compound 9

1D\_C  
0825-p192506

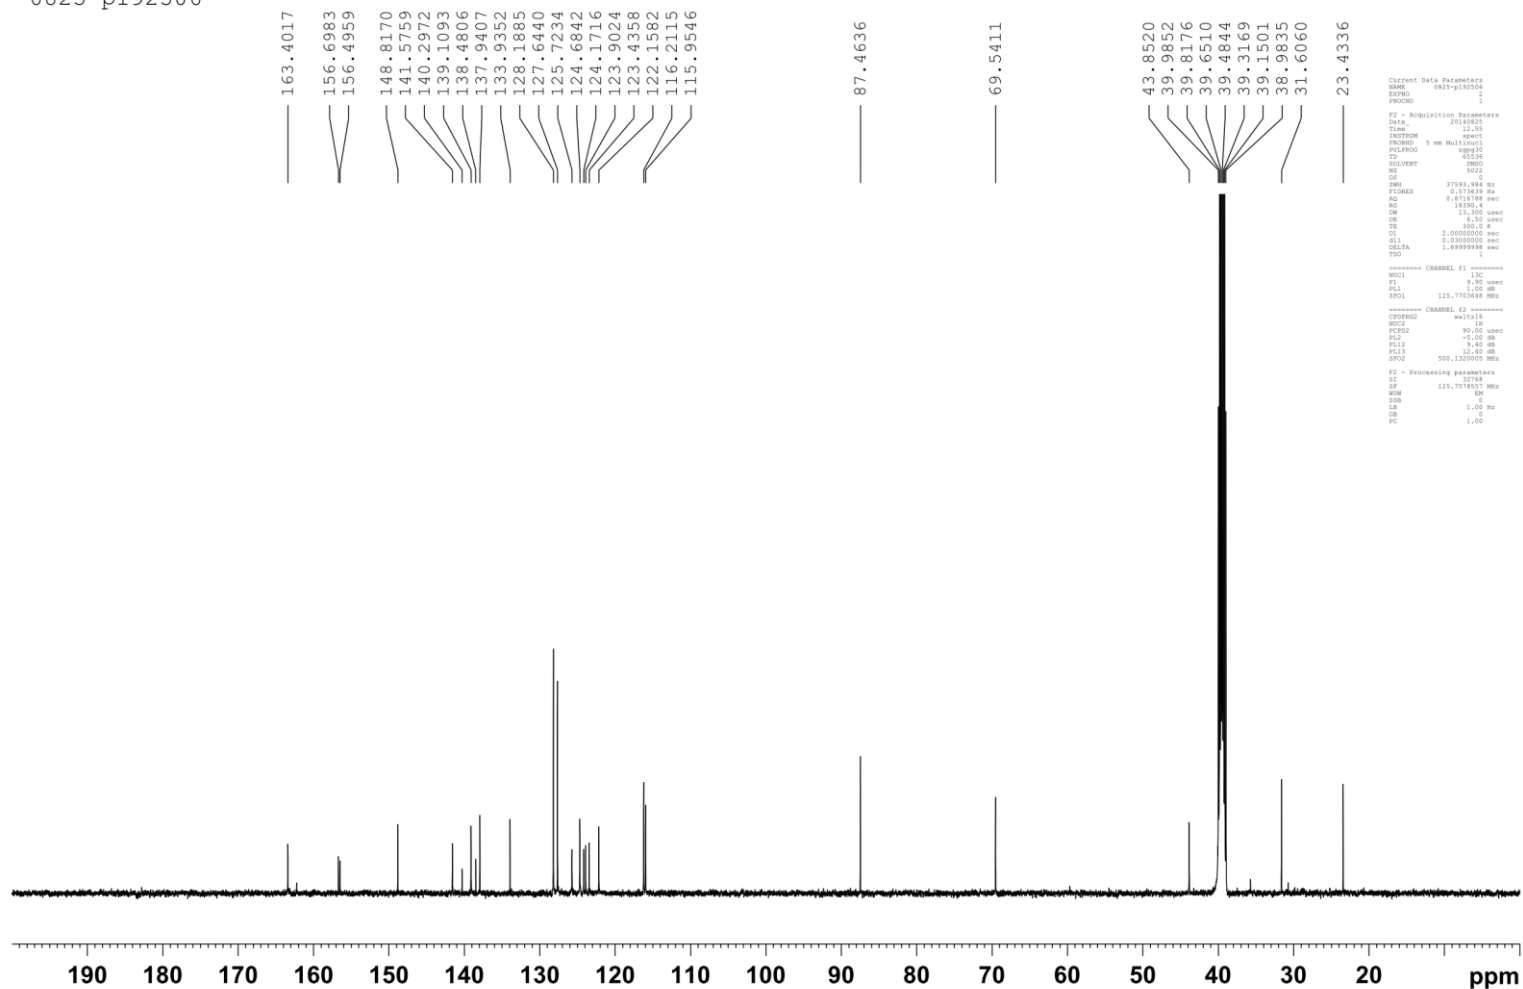

Current Data Parameters  
NAME 0825-p192506  
EXPNO 2  
PROCNO 1  
F2 - Acquisition Parameters  
Date\_ 20140825  
Time 12.55  
INSTRUM spect  
PROBHD 5 mm Hui-150mm1  
PULPROG zgpg30  
TD 65536  
SOLVENT DMSO  
NS 1022  
DS 0  
SWH 37501.884 Hz  
FIDRES 0.1718339 Hz  
AQ 0.1810198 sec  
RG 18180.4  
WE 17.100 umol  
UH 6.50 umol  
TE 300.2 K  
Q1 2.0000000 sec  
Q11 0.0000000 sec  
DELTA 1.8999999 sec  
TD0 1  
===== CHANNEL f1 =====  
NUC1 13C  
P1 9.90 umol  
PL1 1.00 dB  
SFO1 125.7603649 MHz  
===== CHANNEL f2 =====  
CPDPRG2 waltz16  
NUC2 1H  
PCPD2 90.00 umol  
PL2 -5.00 dB  
PL12 9.40 dB  
PL13 12.40 dB  
SFO2 500.1320005 MHz  
F2 - Processing parameters  
SI 32768  
SF 125.7678517 MHz  
WDW EM  
SSB 0  
LB 1.00 Hz  
GB 0  
PC 1.00

<sup>13</sup>C Spectrum for compound 10

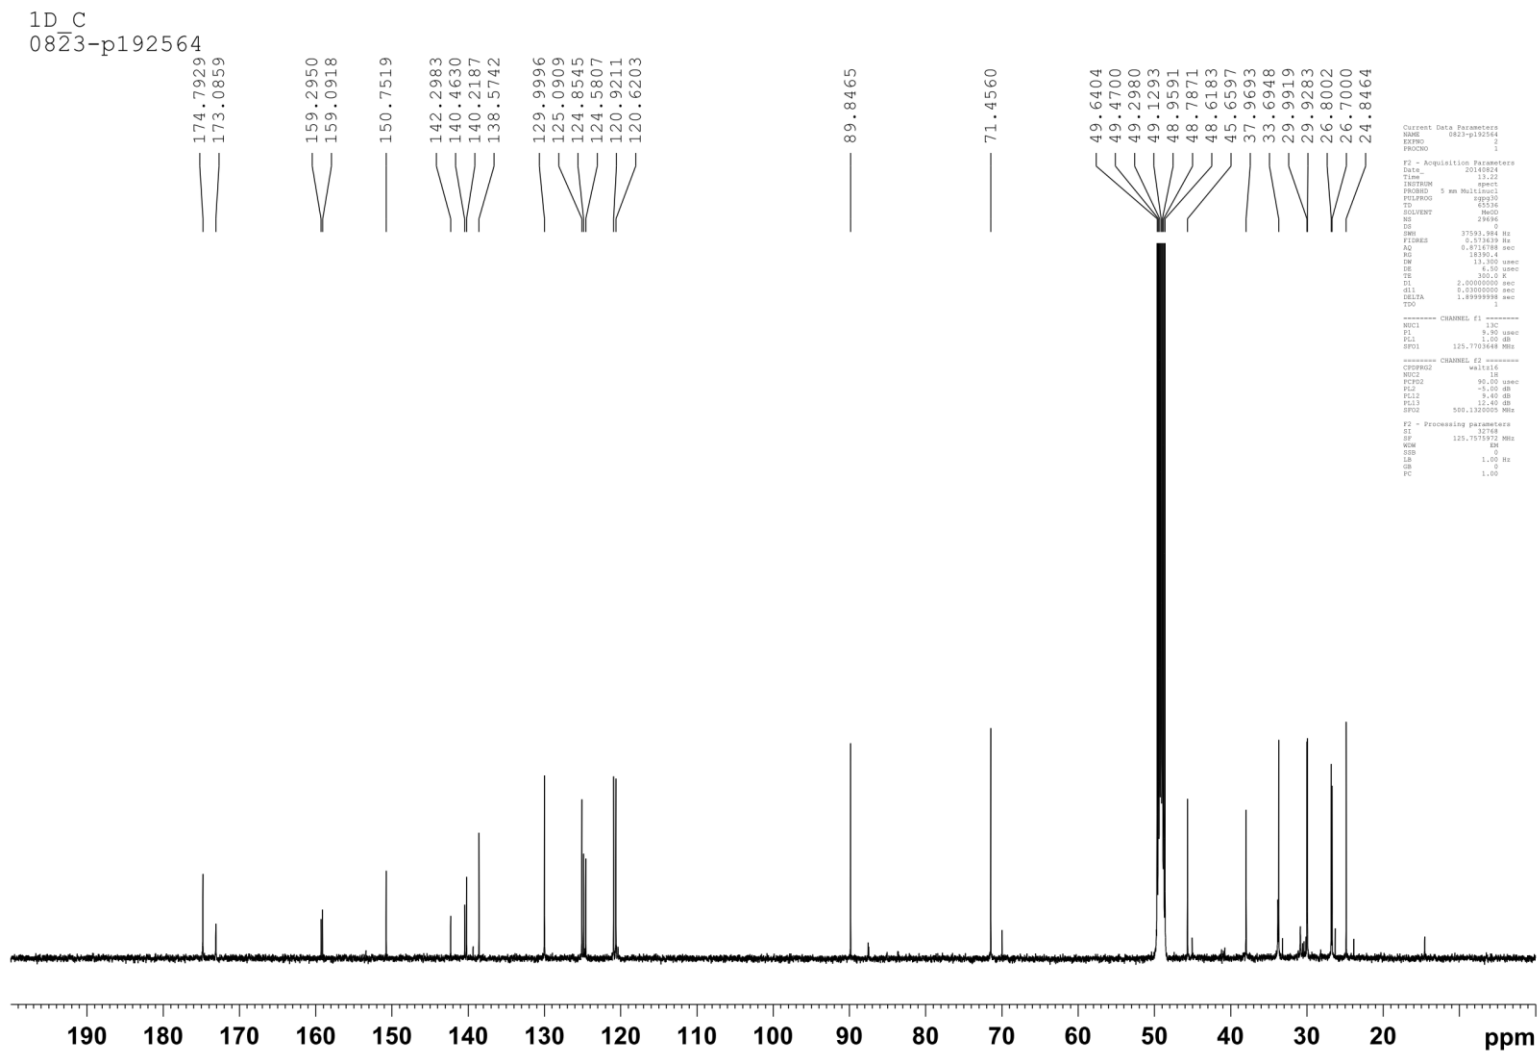

<sup>13</sup>C Spectrum for compound 11

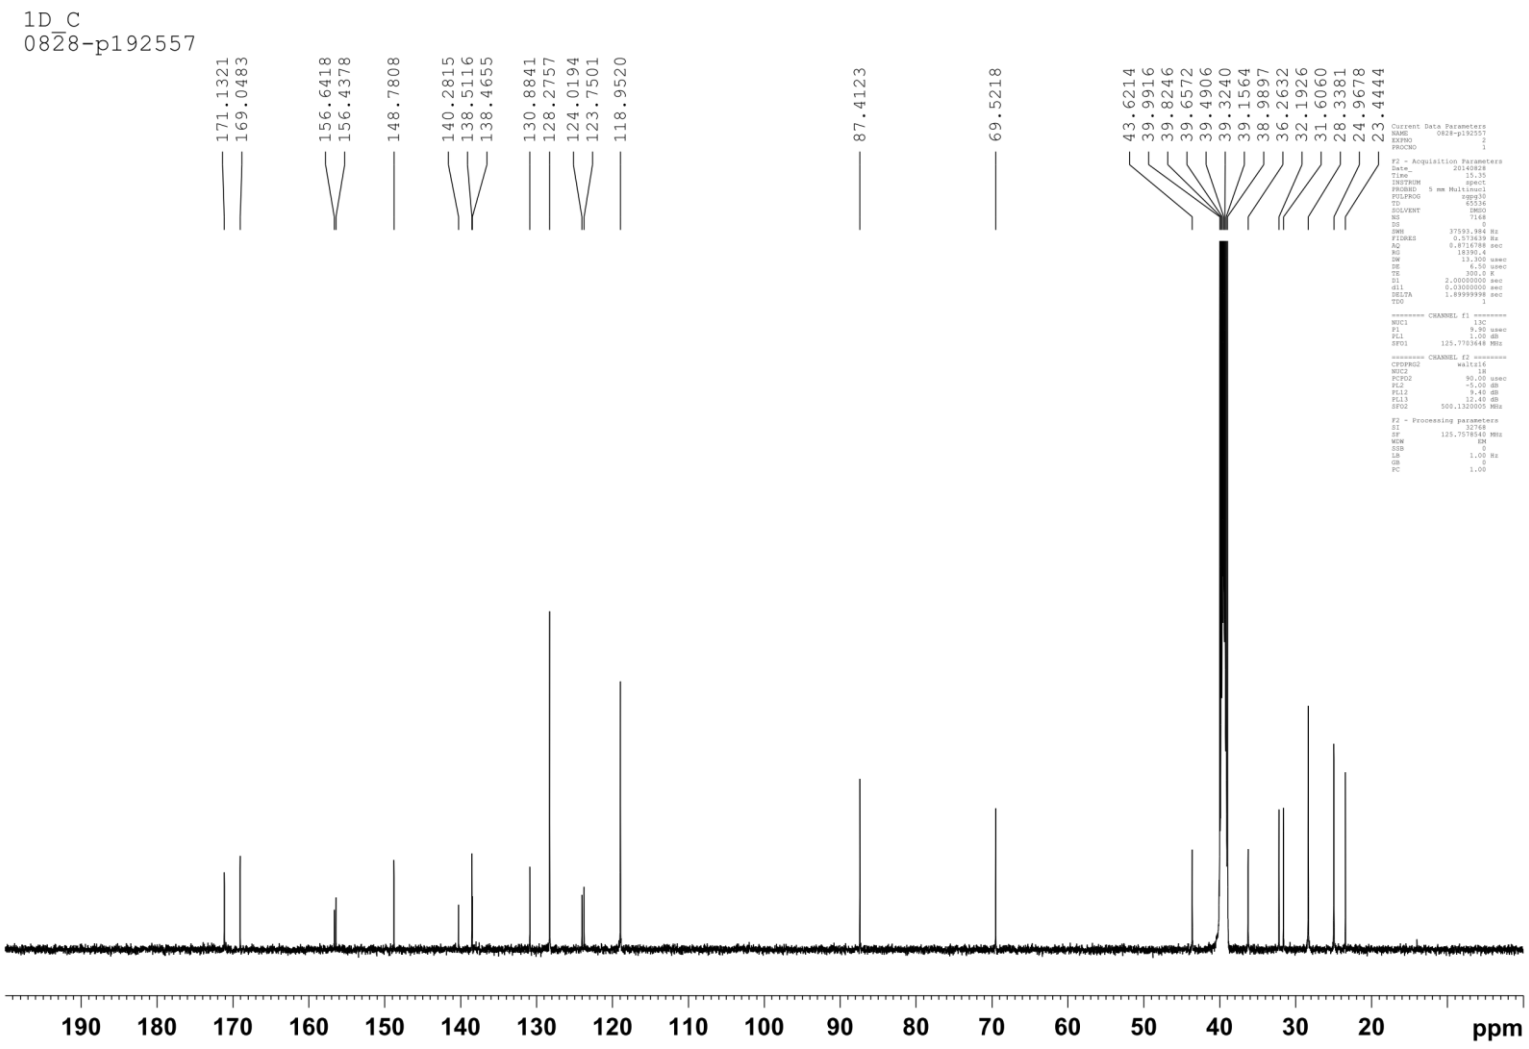

Current Data Parameters  
NAME 0828-p192557  
EXPNO 2  
PROCNO 1  
F2 - Acquisition Parameters  
Date\_ 20140828  
Time 15.35  
INSTRUM spect  
PROBHD 5 mm Huihuiwei  
PULPROG zgpg30  
TD 65536  
FIDRES 0.148  
SOLVENT DMSO  
NS 8  
DSH 37593.864 Hz  
FIDRES 0.071819 Hz  
AQ 0.6718788 sec  
RG 18390.4  
SW 13.300 kHz  
WDW 6.50 kHz  
TE 300.2 K  
SI 2.00000000 sec  
SFO 125.760448 MHz  
DECCA 1.89999998 sec  
TDS 3  
===== CHANNEL f1 =====  
NUC1 13C  
P1 0.30 sec  
PL1 0.00 dB  
SFO1 125.760448 MHz  
===== CHANNEL f2 =====  
CPDPRG2 waltz16  
NUC2 1H  
PCPD2 90.00 kHz  
PL2 -9.00 dB  
PL12 0.40 dB  
PL13 0.40 dB  
PL14 0.40 dB  
SFO2 500.1320005 MHz  
F2 - Processing parameters  
SI 32768  
SF 125.760448 MHz  
WDW 0  
SSB 0  
GB 1.00 Hz  
PC 1.00



$^{13}\text{C}$  Spectrum for compound 12

0804-191926  
1D\_C/CDC13/300K

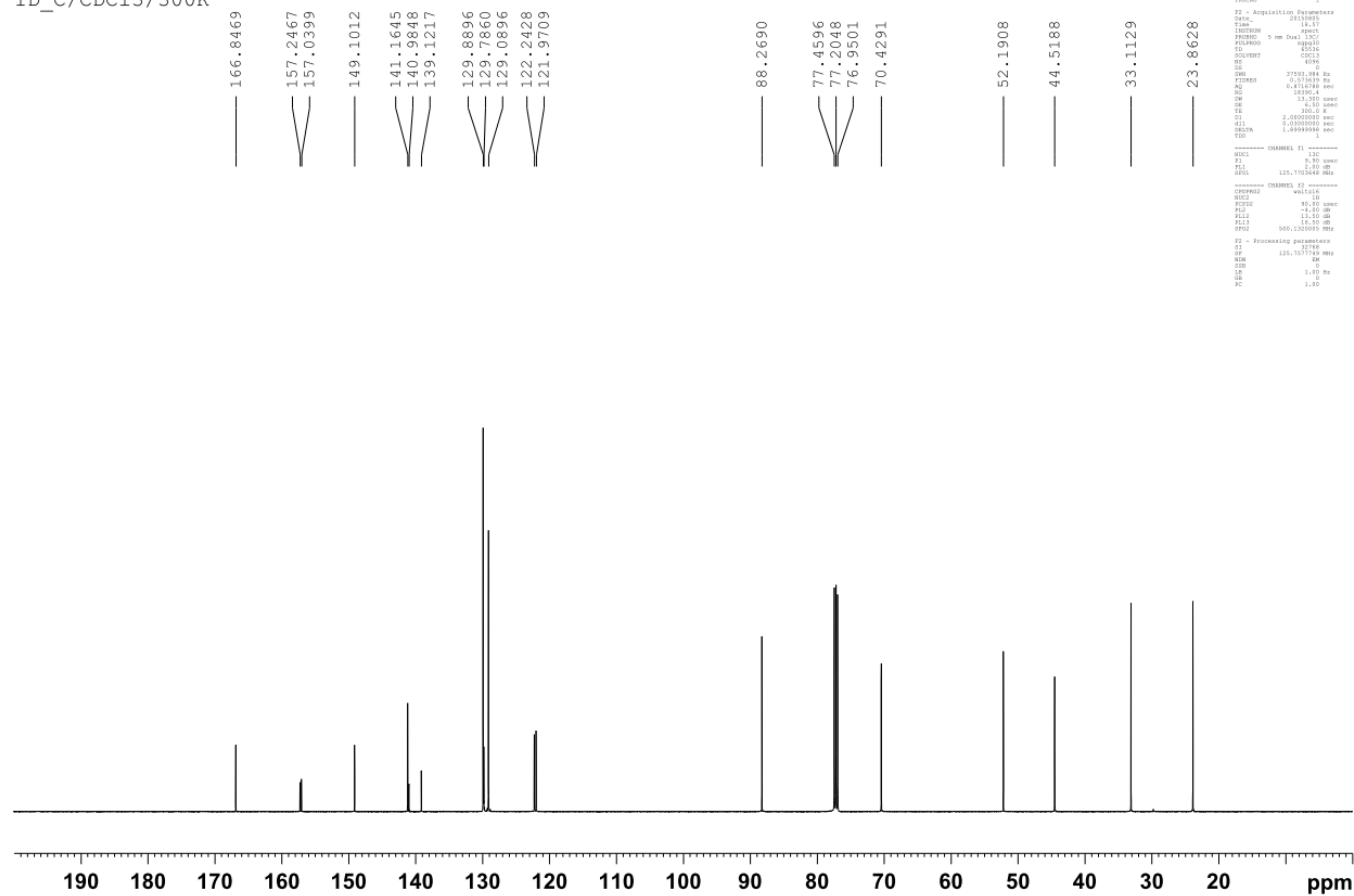

<sup>13</sup>C Spectrum for compound 13

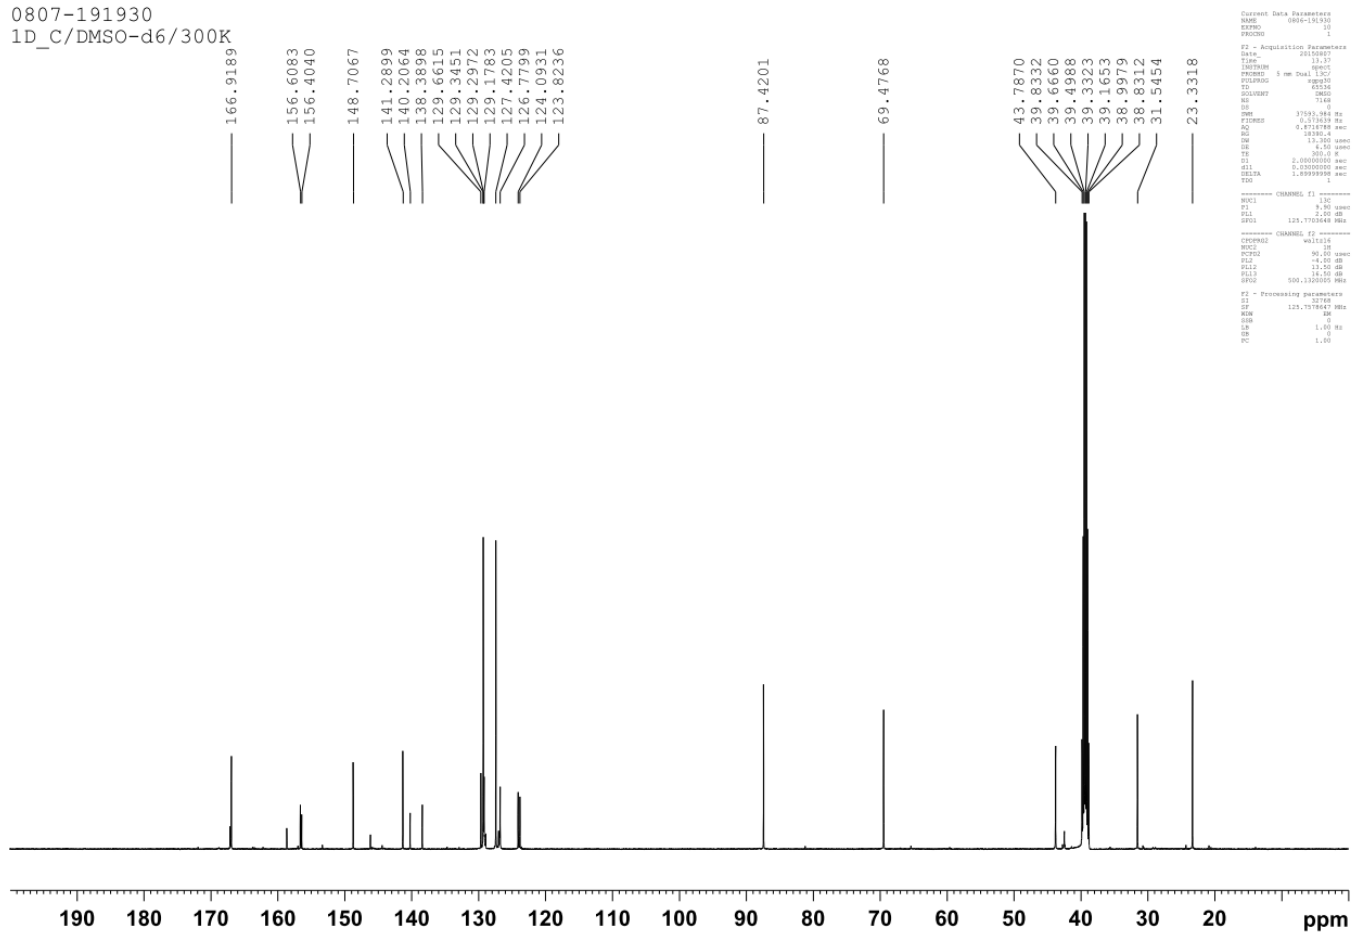

### <sup>13</sup>C Spectrum for compound 14

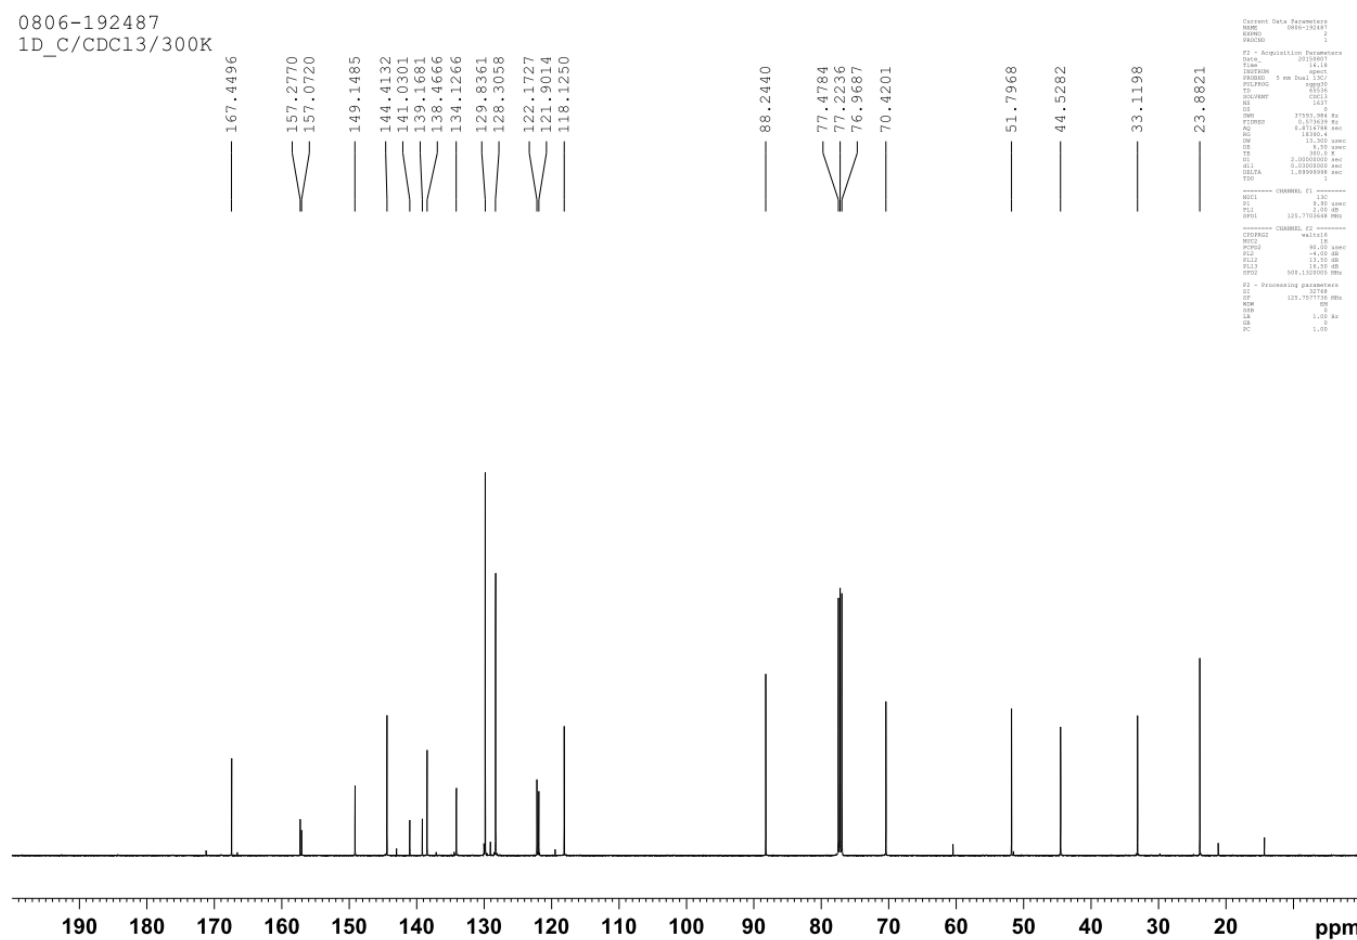

$^{13}\text{C}$  Spectrum for compound 15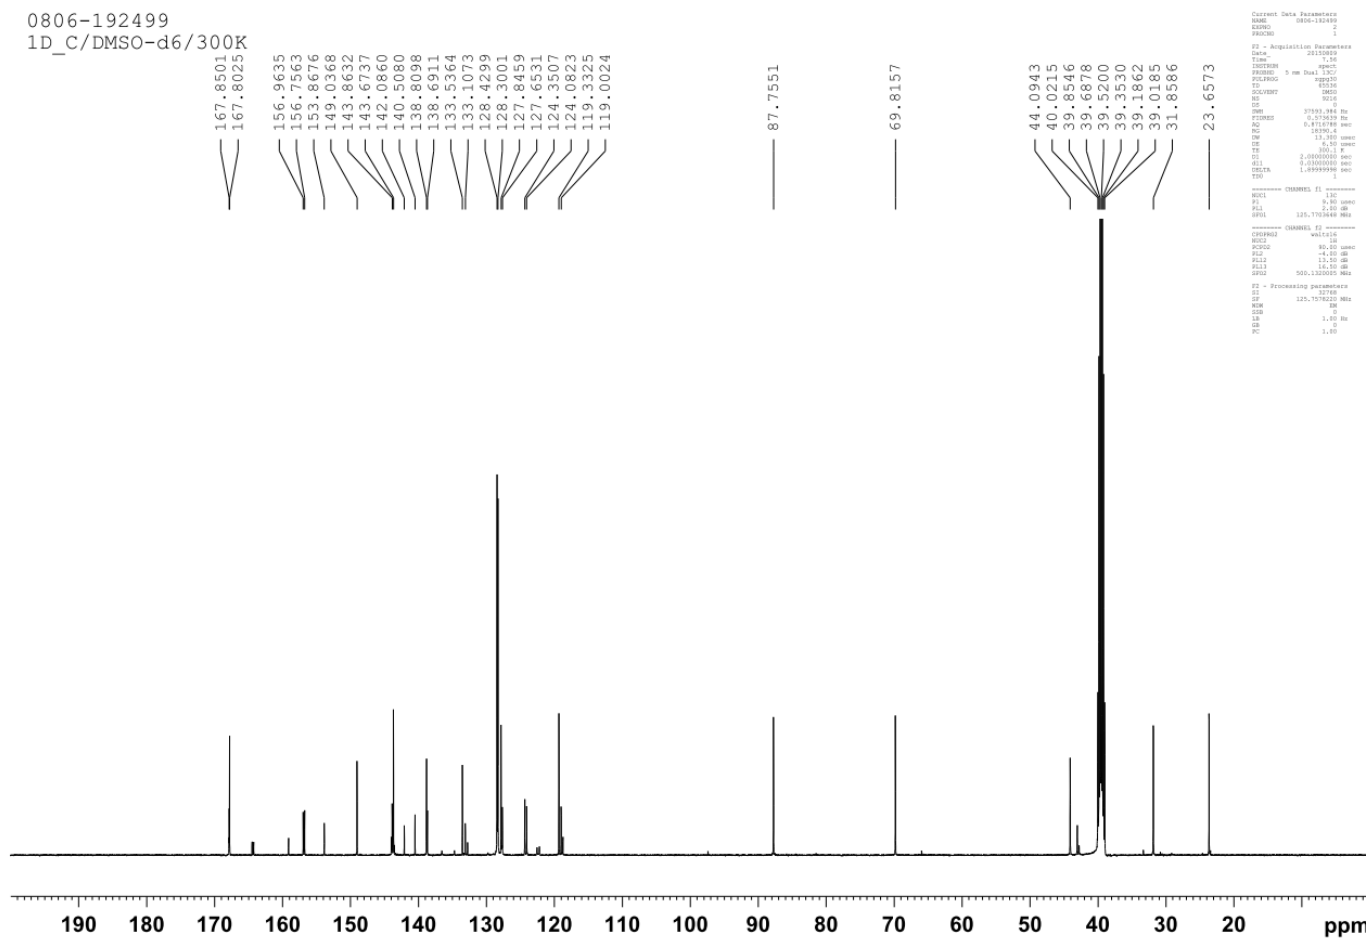

### <sup>13</sup>C Spectrum for compound 16a

0804-192551  
1D\_C/CDC13/300K

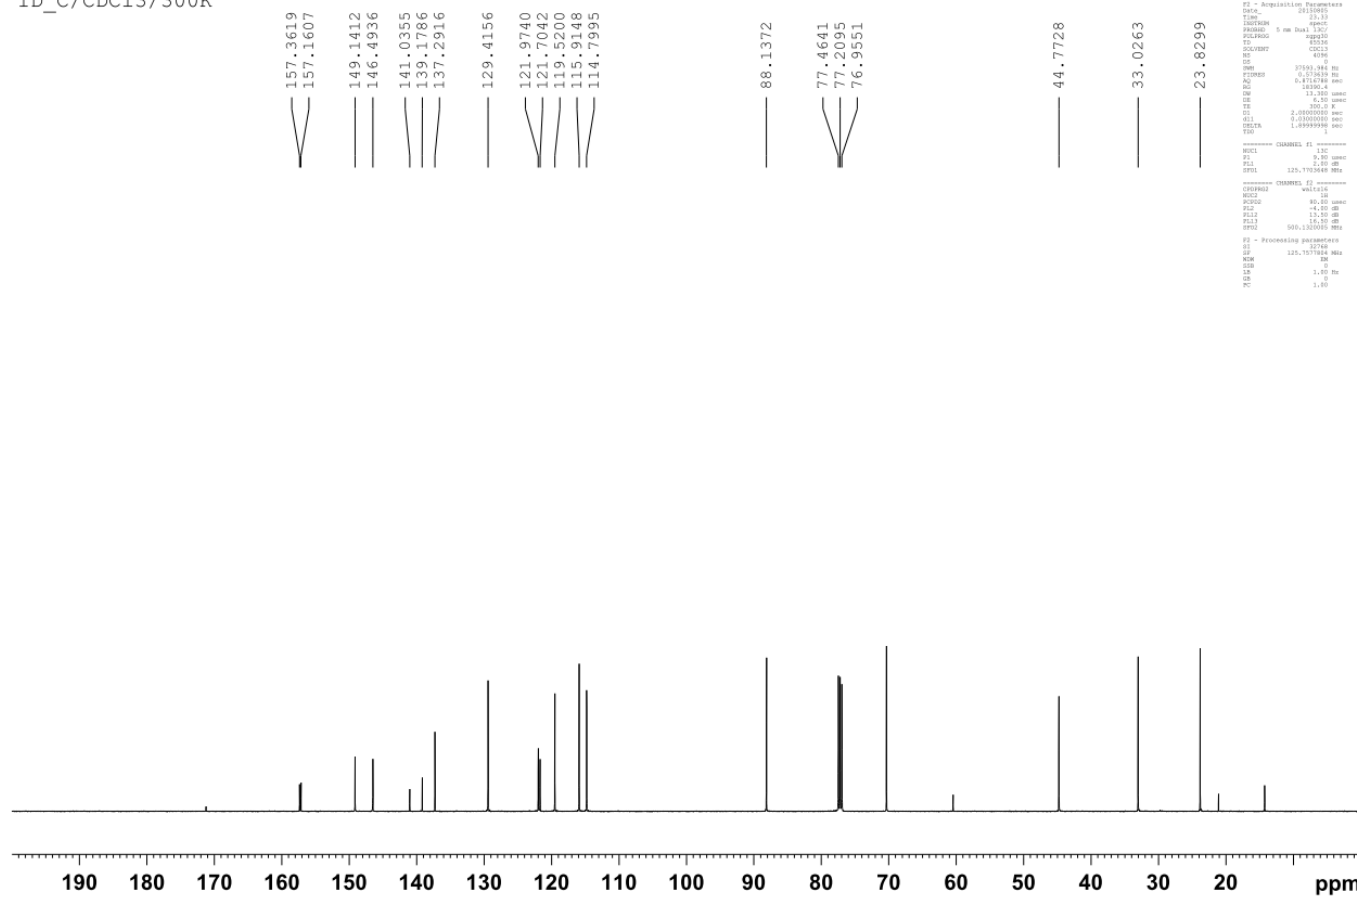

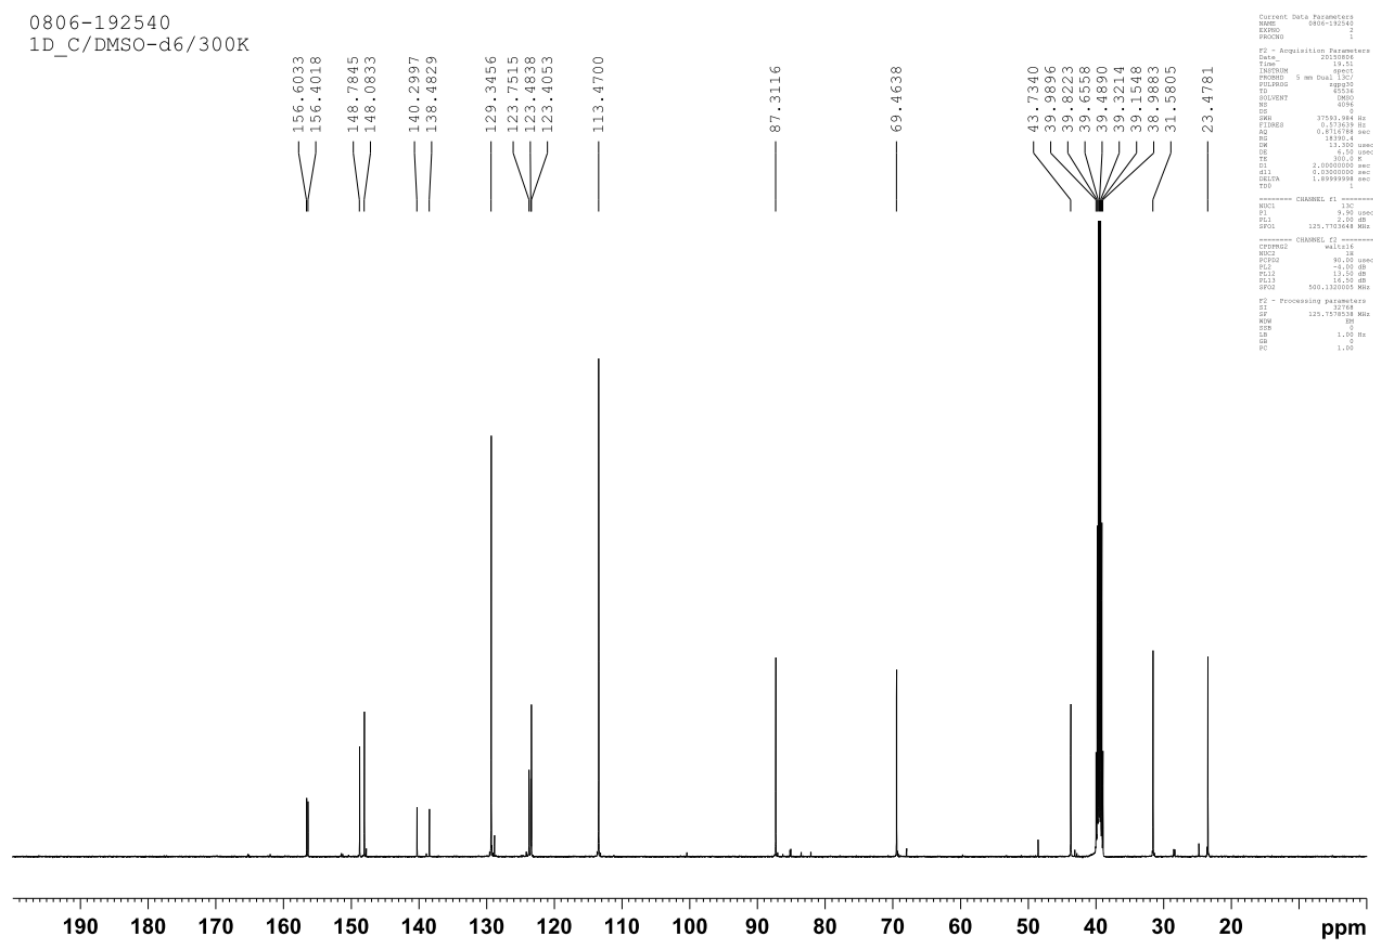

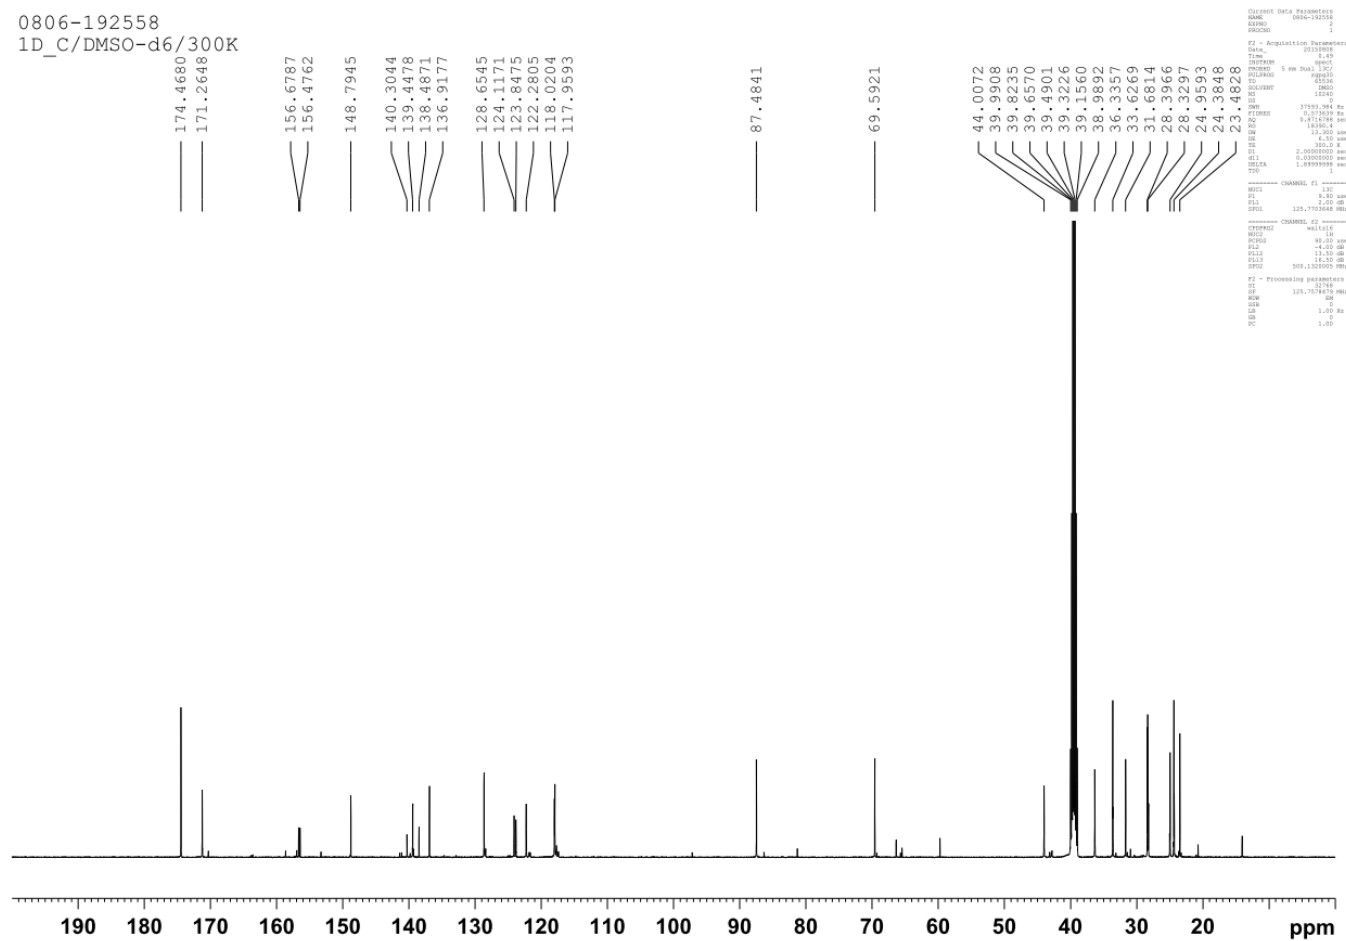

$^{13}\text{C}$  Spectrum for compound 17b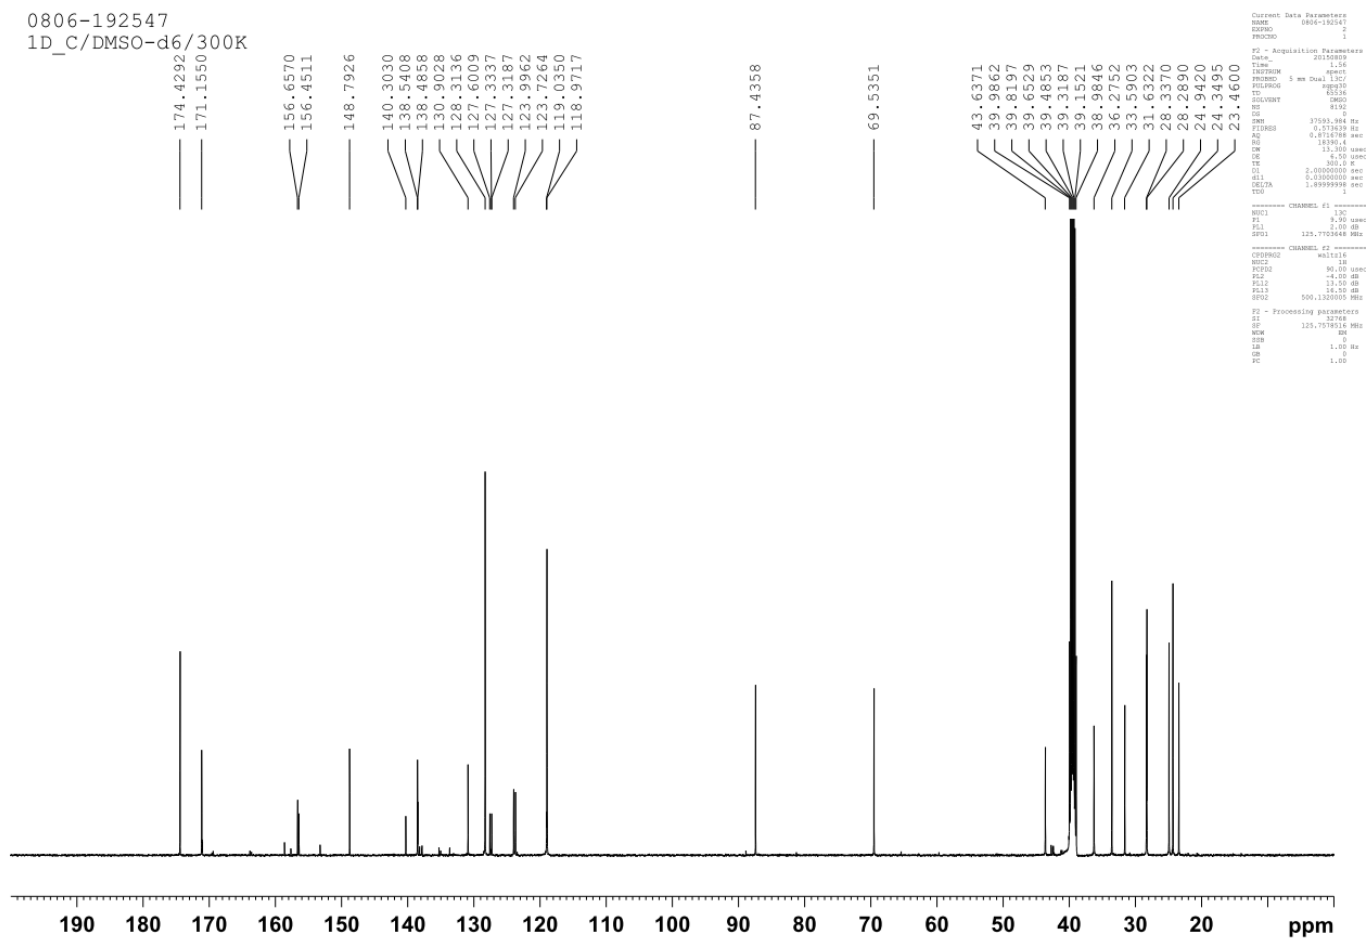

Supplement: c5ob01509j1.pdf [file c5ob01509j1.pdf]
